# Supplementary material for: The polymorphism of porphyrin 2D assemblies at the liquid–graphite interface: the effect of a polar solvent additive and a flexible spacer on the face-on and edge-on type molecular arrangements
Source: Royal Society of Chemistry journal article supplement (doi:10.1039/c9cc02579k), 2019-01-01
Supplement: c9cc02579k1.pdf [file c9cc02579k1.pdf]

## Electronic Supplementary Information

# **Polymorphism of Porphyrin 2D Assemblies at the Liquid–Graphite Interface: Effect of Polar Solvent Additive and Flexible Spacer on the Face-On and Edge-On Type Molecular Arrangements**

Kenya Adachi,<sup>a</sup> Takashi Hirose\*<sup>b</sup> and Kenji Matsuda\*<sup>a</sup>

<sup>a</sup>Department of Synthetic Chemistry and Biological Chemistry, Graduate School of Engineering, Kyoto University, Katsura, Nishikyo-ku, Kyoto 615-8510, Japan.

<sup>b</sup>Institute for Chemical Research, Kyoto University, Uji, Kyoto 611-0011, Japan.

E-mail: [hirose@scl.kyoto-u.ac.jp](mailto:hirose@scl.kyoto-u.ac.jp) (T.H.), [kmatsuda@sbchem.kyoto-u.ac.jp](mailto:kmatsuda@sbchem.kyoto-u.ac.jp) (K.M.)

## Contents:

### 1. Experimental Details

|                                                   |    |
|---------------------------------------------------|----|
| 1.1. Materials and Synthesis .....                | S3 |
| 1.2. STM Measurement .....                        | S5 |
| 1.3. Molecular Modeling on Graphite Surface ..... | S5 |

### 2. Experimental Data

|                                                                                                               |     |
|---------------------------------------------------------------------------------------------------------------|-----|
| <b>Figure S1.</b> Absorption spectra of <b>1-Fb</b> in octanoic acid (OA).....                                | S7  |
| <b>Figure S2.</b> Absorption spectra of <b>1-Fb</b> in phenyl octane (PO).....                                | S8  |
| <b>Table S1.</b> Lattice parameters of <b>1-Fb</b> calculated by MM/MD model.....                             | S9  |
| <b>Figure S3.</b> Optimized MM/MD model of the face-on ordering of <b>1-Fb</b> .....                          | S9  |
| <b>Table S2–S4.</b> Calculated absorption energies of <b>1-Fb</b> by MM/MD model.....                         | S10 |
| <b>Figure S4.</b> Representative STM images of <b>1-Fb</b> at the OA–HOPG interface.....                      | S12 |
| <b>Figure S5.</b> Concentration dependence of surface coverage for <b>1-Fb</b> at the OA–HOPG interface..     | S13 |
| <b>Figure S6.</b> Representative STM images of <b>1-Fb</b> at the PO–HOPG interface.....                      | S14 |
| <b>Table S5.</b> Concentration dependence of surface coverage for <b>1-Fb</b> using PO as a liquid phase..... | S15 |
| <b>Figure S7.</b> Representative STM images of <b>1-Fb</b> at OA/PO–HOPG interface.....                       | S16 |
| <b>Table S6.</b> Concentration dependence of surface coverage for <b>1-Fb</b> at OA/PO–HOPG interface...      | S17 |
| <b>Figure S8.</b> STM images and bar graph showing orderings change by addition of OA.....                    | S18 |
| <b>Figure S9.</b> Time dependence of orderings for <b>1-Fb</b> at the mixed solvent/HOPG interface.....       | S19 |
| <b>Figure S10.</b> Effect of thermal annealing on the 2-D ordering of <b>1-Fb</b> .....                       | S20 |
| <b>Figure S11.</b> High-resolution STM images of <b>2-Fb</b> at OA– and PO–HOPG interfaces.....               | S21 |
| <b>Figure S12.</b> Representative STM images of <b>2-Fb</b> at PO–HOPG interface.....                         | S21 |

### 3. Charts of <sup>1</sup>H and <sup>13</sup>C NMR Spectra .....

S22

### 4. References.....

S29

## 1. Experimental Details

### 1.1 Materials and Synthesis

Unless specifically mentioned, reagents and solvents were obtained from commercial suppliers and used without further purification. All reactions were monitored by thin-layer chromatography carried out on 0.2 mm Merck silica gel plates (60F-254). Column chromatography was performed on silica gel (Nacalai Tesque, 70–230 mesh).  $^1\text{H}$  and  $^{13}\text{C}$  NMR spectra were recorded on a JEOL JNM-ECS400, JEOL JNM-Alpha500, or a JEOL JNM-ECA500 instrument. Proton chemical shifts are reported in ppm downfield from tetramethylsilane (TMS). Mass spectra were obtained by a JEOL JMS-MS700, JEOL JMS-HX110A, or a Thermo Fisher Scientific EXACTIVE mass spectrometer. Synthesis and characterization of compound **1-Fb** has been reported in literatures.<sup>[S1]</sup> Azeotropic mixture of formic acid/triethylamine (5/2) (triethylammonium formate, TEAF) was prepared as follows: triethylamine (22.4 mL, 16.3 g, 161 mmol) was slowly added to a stirred formic acid (15.1 mL, 18.4 g, 400 mmol) at 0 °C.<sup>[S2]</sup>

**2-Fb** with flexible ethylene spacer between amide group and the tetraphenylporphyrin (TPP) core was synthesized according the route shown in Scheme S1. 3-(4-formylphenyl)propanoic acid (**3**)<sup>[S3]</sup> was synthesized in 2 steps from 4-formylbenzonitrile by a Knoevenagel reaction with Meldrum's acid, followed by reduction of nitrile to aldehyde using Raney nickel. Acid-catalyzed condensation reaction of **3** with pyrrole in propionic acid afforded TPP-tetrapropionic acid **4** in 32% yield. 4-Fold amidation reaction of **4** with hexadecylamine successfully provided **2-Fb** in 27% yield.

#### Scheme S1. Synthesis of Compound **2-Fb**

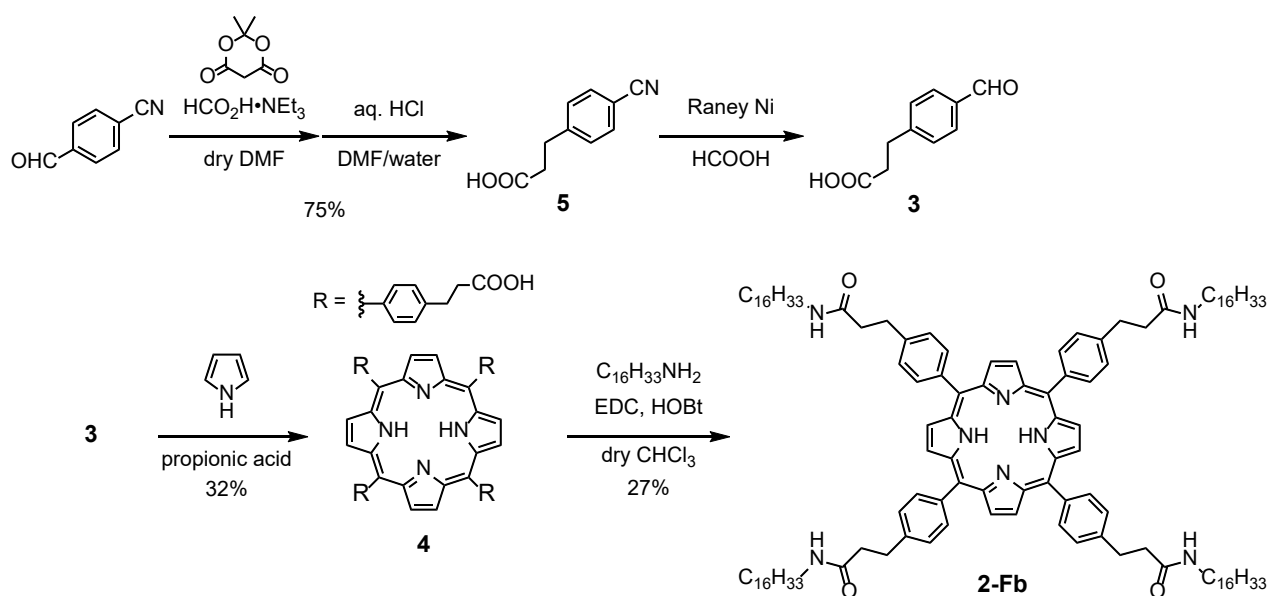

### Synthesis of 3-(4-cyanophenyl)propanoic acid (**5**)

To a solution of **5** (780 mg, 5.95 mmol) in TEAF (30 mL) and DMF (30 mL) was added Meldrum's acid (884 mg, 5.85 mmol). The mixture was slowly heated to over 40 min and was stirred for 7h at the temperature. The resulting solution was then cooled to room temperature and the reaction was quenched by an addition of cooled water. The solution was acidified with concentrated aq. HCl until pH became 1. The reaction product was extracted with Et<sub>2</sub>O. Combined organic layers were washed with water, dried over MgSO<sub>4</sub>, filtered, and evaporated to give compound **5** (779 mg, 4.45 mmol, 75%) as a white solid.

<sup>1</sup>H NMR (400 MHz, CDCl<sub>3</sub>, δ): 2.73 (t, *J* = 7.6 Hz, 2H), 3.04 (t, *J* = 7.6 Hz, 2H), 7.34 (d, *J* = 8.4 Hz, 2H), 7.61 (d, *J* = 8.4 Hz, 2H).

### Synthesis of 3-(4-formylphenyl)propanoic acid (**3**)

To a solution of **5** (1.00 g, 5.71 mmol) in 75% formic acid (15 mL) was added Raney Ni (999 mg). The stirred mixture was heated under reflux for 1.2 h. The mixture was filtered and washed with methanol and water. The filtrate was evaporated and then reprecipitated with water to give compound **3** (764 mg, 4.29 mmol, 75%) as a white solid.

<sup>1</sup>H NMR (400 MHz, CDCl<sub>3</sub>, δ): 2.74 (t, *J* = 7.6 Hz, 2H), 3.06 (t, *J* = 7.6 Hz, 2H), 7.40 (d, *J* = 8.0 Hz, 2H), 7.84 (d, *J* = 8.0 Hz, 2H), 9.99 (s, 1H); HRMS–ESI–orbitrap (*m/z*): [M – H]<sup>–</sup> calcd for C<sub>10</sub>H<sub>9</sub>O<sub>3</sub><sup>–</sup>, 177.0557; found, 177.0552.

### Synthesis of 5,10,15,20-tetrakis(4-(2-carboxyethyl)phenyl)porphyrin (**4**)

To refluxing propionic acid (20 mL) were added pyrrole (0.28 mL, 4.0 mmol) and **3** (712 mg, 4.00 mmol). After refluxing at 140 °C for 1 h, the reaction mixture was cooled to room temperature. After filtration the filter cake was washed with methanol and water to give compound **4** (298 mg, 32%) as a dark purple solid.

<sup>1</sup>H NMR (400 MHz, DMSO, δ): –2.90 (brs, 2H), 2.84 (t, *J* = 7.6 Hz, 8H), 3.18 (t, *J* = 7.6 Hz, 8H), 7.67 (d, *J* = 7.6 Hz, 8H), 8.11 (d, *J* = 6.8 Hz, 8H), 8.80 (s, 8H); HRMS–ESI–orbitrap (*m/z*): [M + H]<sup>+</sup> calcd for C<sub>56</sub>H<sub>47</sub>N<sub>4</sub>O<sub>8</sub><sup>+</sup>, 903.3388; found, 903.3380.

### Synthesis of 5,10,15,20-tetrakis(4-(*N*-hexadecylcarbamoyl)ethyl)phenyl)porphyrin (**2-Fb**)

To a solution of compound **4** (110mg, 12.2 μmol) and trimethylamine (0.5 mL) in chloroform (30 mL) was added 1-hexadecylamine (290 mg, 1.20 mmol) and Water soluble carbodiimide (EDC) (186 mg, 0.97 mmol), 1,2,3-benzotriazole-1-ol (HOBt) (129 mg, 0.95 mmol). The mixture was stirred for 54 hour at room temperature. The organic layer were extracted with aq. NaHCO<sub>3</sub> and washed with water. The organic layer was dried over MgSO<sub>4</sub> and evaporated to give a violet solid. The residue was purified by alumina column chromatography (DCM/MeOH = 99/1) to give compound **2-Fb** (60 mg, 3.3 μmol, 27%) as a violet solid.

<sup>1</sup>H NMR (CDCl<sub>3</sub>, 400 MHz, δ): 8.82 (s, 8H), 8.13 (d, *J* = 8.0 Hz, 8H), 7.59 (d, *J* = 7.6 Hz, 8H), 5.54 (t, *J* = 5.8 Hz, 4H), 3.36 (q., *J* = 7.6 Hz, 8H), 3.34 (q, *J* = 6.8 Hz, 8H), 2.78 (t, *J* = 7.8 Hz, 8H), 1.46–1.34 (m, 126H), 0.89–0.85 (m, 12H), –2.78 (brs, 2H); <sup>13</sup>C NMR (101 MHz, CDCl<sub>3</sub>, δ) 0.087, 14.21, 22.77, 27.08, 29.43, 29.71, 29.88, 31.79, 31.99, 38.70, 39.82, 120.01, 126.77, 134.86, 140.17, 140.52, 172.10; HRMS–MALDI–orbitrap (*m/z*): [M + H]<sup>+</sup> calcd for C<sub>120</sub>H<sub>179</sub>N<sub>8</sub>O<sub>4</sub><sup>+</sup>, 1796.4044; found, 1796.3977.

### *Synthesis of 5,10,15,20-tetrakis(4-(N-hexadecylcarbamoyl)phenyl)porphyrin (1-Fb)*

To a solution of tetrakis(4-carboxyphenyl)porphyrin (100mg, 12.6  $\mu\text{mol}$ ) and trimethylamine (0.5 mL) in chloroform (30 mL) was added 1-hexadecylamine (243 mg, 1.01 mmol) and water soluble carbodiimide (EDC) (208 mg, 1.01 mmol), 1,2,3-benzotriazole-1-ol (HOBt) (137 mg, 1.01 mmol). The mixture was stirred for 19 hour at room temperature. The organic layer were extracted with aq.  $\text{NaHCO}_3$  and washed with water. The organic layer was dried over  $\text{MgSO}_4$  and evaporated to give a violet solid. The residue was purified by alumina column chromatography (DCM/MeOH = 99/1) to give compound **1-Fb** (64 mg, 3.8  $\mu\text{mol}$ , 30%) as a violet solid.

$^1\text{H}$  NMR ( $\text{CDCl}_3$ , 400 MHz,  $\delta$ ): 8.82 (s, 8H), 8.28 (d,  $J = 8.0$  Hz, 8H), 8.16 (d,  $J = 8.4$  Hz, 8H), 6.44 (t,  $J = 5.6$  Hz, 4H), 3.65 (q.,  $J = 6.8$  Hz, 8H), 1.82–1.74 (m, 8H), 1.44–1.26 (m, 106H), 0.87 (t,  $J = 6.4$  Hz, 12H), –2.82 (brs, 2H);  $^{13}\text{C}$  NMR (101 MHz,  $\text{CDCl}_3$ ,  $\delta$ ): 0.078, 14.21, 22.77, 27.23, 29.44, 29.51, 29.80, 29.93, 32.00, 40.50, 119.44, 125.41, 134.54, 134.70, 145.13, 167.63.

### **1.2. STM Measurement**

All STM experiments were performed at room temperature and ambient conditions. The STM images were acquired with an Agilent technologies 5500 scanning probe microscopes in the constant current mode. The STM tips used in this research were mechanically cut from a Pt/Ir wire (80/20, diameter 0.25 mm). Highly oriented pyrolytic graphite (HOPG) (ZYG grade, purchased from the ALLIANCE Biosystems Co.) was used as a substrate. To prepare a solution of **1-Fb** and **2-Fb** in octanoic acid and phenyloctane, **1-Fb** and **2-Fb** was dissolved in chloroform and then dispersed in each solution (chloroform/octanoic acid = 1/19, chloroform/phenyloctane = 1/19). A drop of the solution (10  $\mu\text{L}$ ) was deposited onto freshly cleaved HOPG using a micropipette, and the Pt/Ir tip was immersed into the solution and then the image was scanned. STM images were analyzed by using the graphite substrate as a calibration grid. The total STM scans were performed 2 times in order to determine an averaged surface coverage at a concentration of sample solution. The effect of thermal drift in STM measurements was corrected using two continuous STM images; one of the up- and down-scans of high-resolution STM images was stretched and the other was compressed along the vertical direction at the same scaling factor. Subsequently, the resulting set of images were sheared along the horizontal direction at the same shear angle with the opposite sign, so that the resulting unit cell parameters of the set of images are identical after the drift correction. The scaling factor and shear angle were estimated from the original unit cell parameters before the drift correction using the solver function in Microsoft Excel 2016. For an accurate analysis of lattice parameters ( $a$ ,  $b$ , and  $\alpha$ ), evenly distributed grid lines were placed on a high resolution STM image so that all grid lines were consistent with the experimentally observed periodic pattern of molecular ordering. The length of the  $a$ - and  $b$ -axes, and the angle  $\alpha$  were determined from the coordinates of intersection of the grid lines.

### **1.3. Molecular Modeling on Graphite Surface**

The molecular ordering adsorbed on HOPG surface was modeled by a molecular mechanics/molecular dynamics (MM/MD) approach using BIOVIA Materials Studio 2018, Dassault Systems. The Dreiding force field implemented in the Forcite module was used for MM and MD calculations. The initial geometries were inspired from experimentally observed high resolution STM images for each ordering. For HOPG substrate, only one layer of graphene sheet (C–C bond length is 1.42 Å, flat geometry

having hexagonal symmetry,  $150 \times 150$  superlattice of unit cell of graphene) was assumed using periodic boundary conditions ( $a = 36.9$  nm,  $b = 36.9$  nm,  $c = 5$  nm (thickness of vacuum slab along the  $c$ -axis),  $\alpha = \beta = 90^\circ$ ,  $\gamma = 120^\circ$ ). The Cartesian position of the graphene sheet was fixed during MM/MD calculation to suppress deformation/distortion of substrate. The face-on ordering consisting of 32 ( $8 \times 4$ ) molecules and the edge-on ordering of 48 ( $12 \times 4$ ) molecules on the graphene sheet were calculated to determine the unit cell parameters and adsorption energies.

## 2. Experimental Data

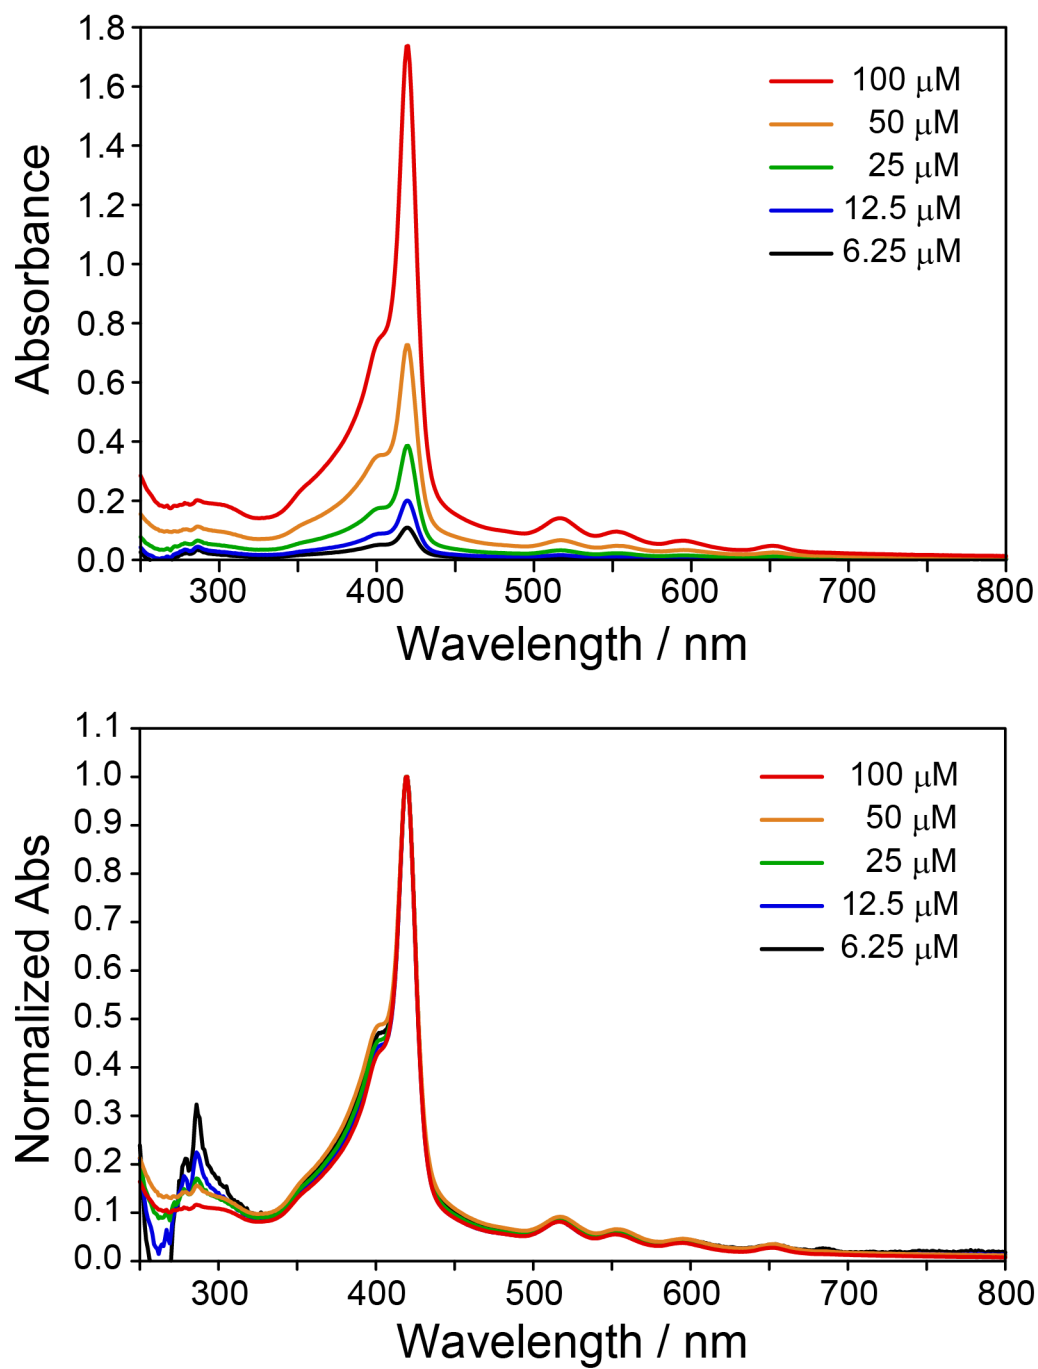

**Figure S1.** UV-vis absorption spectra of **1-Fb** in octanoic acid (optical path = 1 mm).

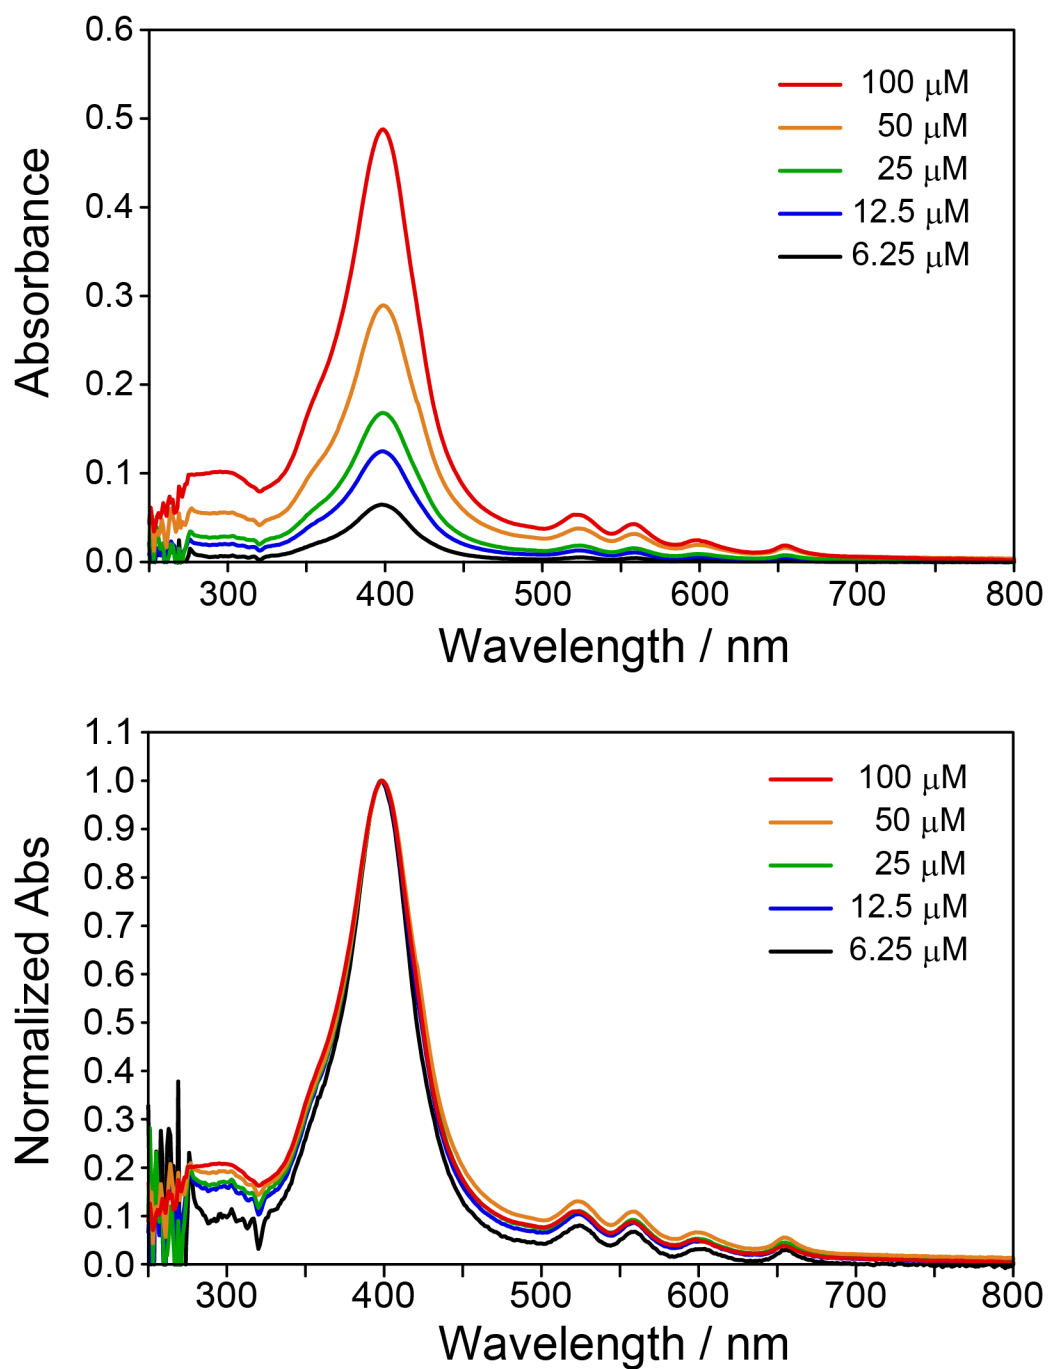

**Figure S2.** UV-vis absorption spectra of **1-Fb** in phenyl octane (optical path = 1 mm).



**Table S1.** Lattice parameters of the 2D orderings of **1-Fb** calculated by MM/MD model<sup>a</sup>

| polymorph | unit cell parameters |               |              |                                          |
|-----------|----------------------|---------------|--------------|------------------------------------------|
|           | <i>a</i> (nm)        | <i>b</i> (nm) | $\alpha$ (°) | <i>S</i> (nm <sup>2</sup> ) <sup>b</sup> |
| face-on   | 3.86                 | 1.86          | 75.1         | 6.94                                     |
| edge-on   | 5.21                 | 0.51          | 89.2         | 2.66                                     |

<sup>a</sup>Calculated using BIOVIA Materials Studio 2018, Dassault Systems. The Dreiding force field implemented in the Forcite module was used for MM/MD calculations. <sup>b</sup>The unit area occupied by one molecule of **1-Fb** on the surface.

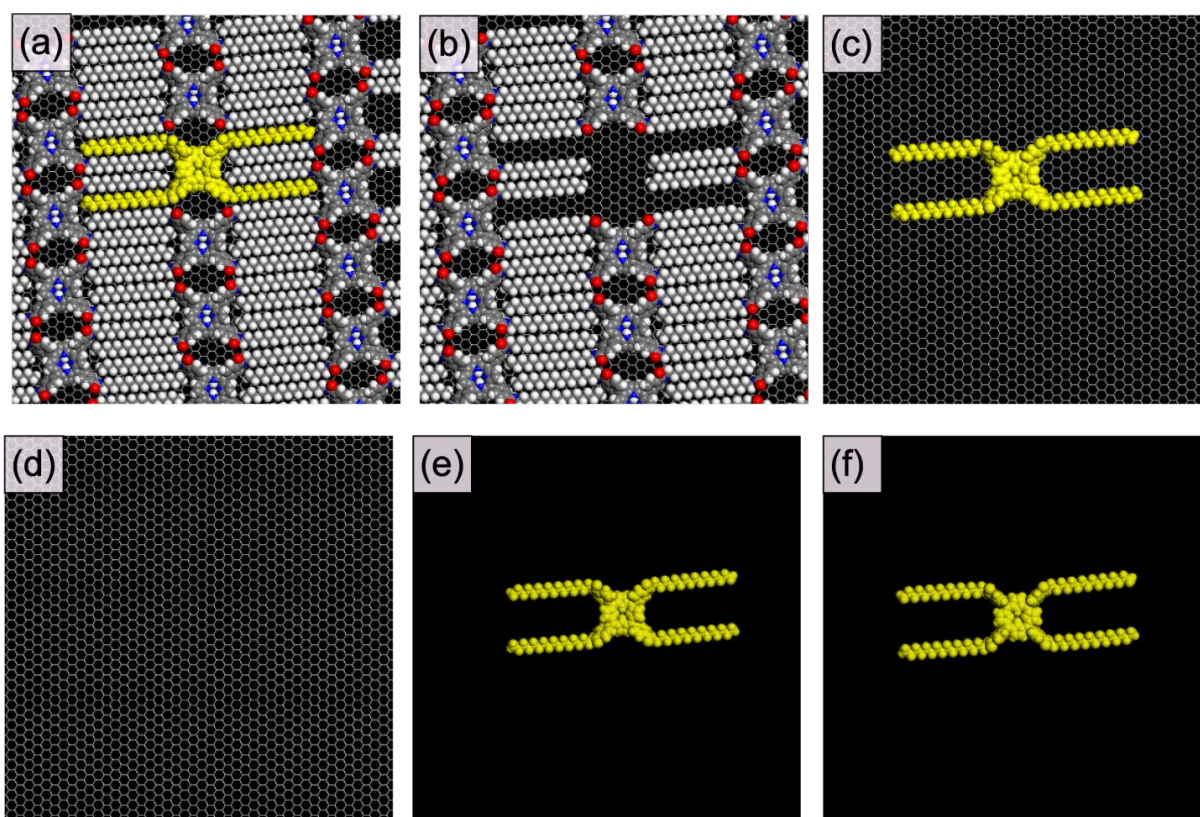

**Figure S3.** (a) Optimized molecular model of the 2-D ordering of face-on composed of 32 molecules of **1-Fb** on HOPG substrate using MM calculations (force field, Dreiding; quality, ultra-fine). The total energy of the structure was  $E_{\text{ordering+HOPG}} = 2969.89 \text{ kcal}\cdot\text{mol}^{-1}$ . Molecular models for the single-point energy calculations: (b) one molecule of face-on ordering highlighted by yellow was removed from the 2-D ordering on HOPG ( $E_{\text{defect}}$ ), (c) one molecule on HOPG ( $E_{\text{monomer+HOPG}}$ ), (d) HOPG substrate only ( $E_{\text{HOPG}}$ ), (e) one molecule without HOPG ( $E_{\text{monomer}}$ ), and (f) one molecule optimized in gas phase without HOPG. For the calculation of edge-on, an optimized molecular model of the 2-D ordering composed of 48 molecules on HOPG substrate were used. The total energy of each structure and energy contributions are summarized in Tables S2 and S3. It is noted that the effect of entropy change and interaction with solvent molecules were not taken into account in the calculation.

**Table S2.** Total energy and each energy contribution of the face-on ordering of **1-Fb** on HOPG substrate.<sup>a</sup>

|                                 | $E_{\text{ordering+HOPG}}^b$<br>/kcal·mol <sup>-1</sup> | $E_{\text{defect}}^c$<br>/kcal·mol <sup>-1</sup> | $E_{\text{monomer+HOPG}}^d$<br>/kcal·mol <sup>-1</sup> | $E_{\text{HOPG}}^e$<br>/kcal·mol <sup>-1</sup> | $E_{\text{monomer}}^f$<br>/kcal·mol <sup>-1</sup> |
|---------------------------------|---------------------------------------------------------|--------------------------------------------------|--------------------------------------------------------|------------------------------------------------|---------------------------------------------------|
| Total energy                    | 2969.89                                                 | 2936.04                                          | 131.17                                                 | 0.00                                           | 337.32                                            |
| Contributions to total energy   |                                                         |                                                  |                                                        |                                                |                                                   |
| Valence energy (diagonal terms) |                                                         |                                                  |                                                        |                                                |                                                   |
| Bond                            | 849.12                                                  | 822.60                                           | 26.51                                                  | 0.00                                           | 26.51                                             |
| Angle                           | 2815.13                                                 | 2726.85                                          | 88.28                                                  | 0.00                                           | 88.28                                             |
| Torsion                         | 1376.31                                                 | 1333.82                                          | 42.49                                                  | 0.00                                           | 42.49                                             |
| Inversion                       | 26.04                                                   | 25.27                                            | 0.77                                                   | 0.00                                           | 0.77                                              |
| Non-bond energy                 |                                                         |                                                  |                                                        |                                                |                                                   |
| Hydrogen bond                   | -14.96                                                  | -14.50                                           | -0.47                                                  | 0.00                                           | -0.47                                             |
| van der Waals                   | -2063.97                                                | -1940.81                                         | -25.89                                                 | 0.00                                           | 179.73                                            |
| Long range correction           | -17.78                                                  | -17.19                                           | -0.53                                                  | 0.00                                           | 0.00                                              |

<sup>a</sup>Calculated with Forcite module implemented in Materials Studio 2018 in gas phase (force field, Dreiding; quality: ultra-fine) for 32 (8 × 4) molecules of **1-Fb** on one layer of graphene sheet in the gas phase. <sup>b</sup>Single-point energy of the molecular ordering with HOPG substrate. <sup>c</sup>Single-point energy of the molecular model in which one molecule was removed from the ordering on HOPG. <sup>d</sup>Single-point energy of one molecule on HOPG. <sup>e</sup>Single-point energy of HOPG substrate. <sup>f</sup>Single-point energy of one molecule without HOPG.

**Table S3.** Total energy and each energy contribution of the edge-on ordering of **1-Fb** on HOPG substrate.<sup>a</sup>

|                                 | $E_{\text{ordering+HOPG}}^b$<br>/kcal·mol <sup>-1</sup> | $E_{\text{defect}}^c$<br>/kcal·mol <sup>-1</sup> | $E_{\text{monomer+HOPG}}^d$<br>/kcal·mol <sup>-1</sup> | $E_{\text{HOPG}}^e$<br>/kcal·mol <sup>-1</sup> | $E_{\text{monomer}}^f$<br>/kcal·mol <sup>-1</sup> |
|---------------------------------|---------------------------------------------------------|--------------------------------------------------|--------------------------------------------------------|------------------------------------------------|---------------------------------------------------|
| Total energy                    | 8482.94                                                 | 8407.70                                          | 262.71                                                 | 0.00                                           | 358.17                                            |
| Contributions to total energy   |                                                         |                                                  |                                                        |                                                |                                                   |
| Valence energy (diagonal terms) |                                                         |                                                  |                                                        |                                                |                                                   |
| Bond                            | 1213.91                                                 | 1188.53                                          | 25.38                                                  | 0.00                                           | 25.38                                             |
| Angle                           | 4265.81                                                 | 4175.30                                          | 90.51                                                  | 0.00                                           | 90.51                                             |
| Torsion                         | 3052.65                                                 | 2984.72                                          | 67.94                                                  | 0.00                                           | 67.94                                             |
| Inversion                       | 99.37                                                   | 96.50                                            | 2.87                                                   | 0.00                                           | 2.87                                              |
| Non-bond energy                 |                                                         |                                                  |                                                        |                                                |                                                   |
| Hydrogen bond                   | -242.40                                                 | -229.64                                          | -0.79                                                  | 0.00                                           | -0.79                                             |
| van der Waals                   | 120.97                                                  | 219.04                                           | 77.33                                                  | 0.00                                           | 172.26                                            |
| Long range correction           | -27.37                                                  | -26.75                                           | -0.53                                                  | 0.00                                           | 0.00                                              |

<sup>a</sup>Calculated with Forcite module implemented in Materials Studio 2018 in gas phase (force field, Dreiding; quality: ultra-fine) for 48 (12 × 4) molecules of **1-Fb** on one layer of graphene sheet in the gas phase. <sup>b</sup>Single-point energy of the molecular ordering with HOPG substrate. <sup>c</sup>Single-point energy of the molecular model in which one molecule was removed from the ordering on HOPG. <sup>d</sup>Single-point energy of one molecule on HOPG. <sup>e</sup>Single-point energy of HOPG substrate. <sup>f</sup>Single-point energy of one molecule without HOPG.

**Table S4.** Adsorption energies for the face-on ordering of **1-Fb** on HOPG substrate<sup>a</sup>

|                                 | $E_{\text{mol-sub}}^b$<br>/kcal·mol <sup>-1</sup> | $E_{\text{mol-mol}}^c$<br>/kcal·mol <sup>-1</sup> | $E_{\text{ads}}^d$<br>/kcal·mol <sup>-1</sup> | $S^e$<br>/nm <sup>2</sup> | $E_{\text{ads per area}}^f$<br>/kcal·mol <sup>-1</sup> ·nm <sup>-2</sup> |
|---------------------------------|---------------------------------------------------|---------------------------------------------------|-----------------------------------------------|---------------------------|--------------------------------------------------------------------------|
| Total energy                    | -206.15                                           | -48.66                                            | -254.81                                       | 6.54                      | -38.95                                                                   |
| Contributions to total energy   |                                                   |                                                   |                                               |                           |                                                                          |
| Valence energy (diagonal terms) |                                                   |                                                   |                                               |                           |                                                                          |
| Bond                            | 0.00                                              | 0.00                                              | 0.00                                          | –                         | 0.00                                                                     |
| Angle                           | 0.00                                              | 0.00                                              | 0.00                                          | –                         | 0.00                                                                     |
| Torsion                         | 0.00                                              | 0.00                                              | 0.00                                          | –                         | 0.00                                                                     |
| Inversion                       | 0.00                                              | 0.00                                              | 0.00                                          | –                         | 0.00                                                                     |
| Non-bond energy                 |                                                   |                                                   |                                               |                           |                                                                          |
| Hydrogen bond                   | 0.00                                              | 0.00                                              | 0.00                                          | –                         | 0.00                                                                     |
| van der Waals                   | -205.62                                           | -48.63                                            | -254.25                                       | –                         | -38.86                                                                   |
| Long range correction           | -0.53                                             | -0.03                                             | -0.56                                         | –                         | -0.08                                                                    |

<sup>a</sup>Calculated from total energy and each energy contribution summarized in Table S2. <sup>b</sup>The molecule–substrate interaction energy calculated as follows,  $E_{\text{mol-sub}} = E_{\text{monomer+HOPG}} - (E_{\text{monomer}} + E_{\text{HOPG}})$ . <sup>c</sup>The molecule–molecule interaction energy calculated as follows,  $E_{\text{mol-mol}} = \{E_{\text{ordering+HOPG}} - (E_{\text{defect}} + E_{\text{monomer}}) - E_{\text{mol-sub}}\}/2$ . <sup>d</sup>The adsorption energy calculated as follows,  $E_{\text{ads}} = E_{\text{mol-sub}} + E_{\text{mol-mol}}$ . <sup>e</sup>The unit area occupied by one molecule of **1-Fb** on the surface determined by STM measurement at the PO/HOPG interface ( $a = 3.63$  nm,  $b = 1.82$  nm,  $\alpha = 82^\circ$ ). <sup>f</sup>The adsorption energy per unit area calculated as follows,  $E_{\text{ads per area}} = E_{\text{ads}}/S$ . Other contributions such as (1) effects of entropy and (2) solvent interactions were not taken into account in this calculation.

**Table S5.** Adsorption energies for the edge-on ordering of **1-Fb** on HOPG substrate<sup>a</sup>

|                                 | $E_{\text{mol-sub}}^b$<br>/kcal·mol <sup>-1</sup> | $E_{\text{mol-mol}}^c$<br>/kcal·mol <sup>-1</sup> | $E_{\text{ads}}^d$<br>/kcal·mol <sup>-1</sup> | $S^e$<br>/nm <sup>2</sup> | $E_{\text{ads per area}}^f$<br>/kcal·mol <sup>-1</sup> ·nm <sup>-2</sup> |
|---------------------------------|---------------------------------------------------|---------------------------------------------------|-----------------------------------------------|---------------------------|--------------------------------------------------------------------------|
| Total energy                    | -95.46                                            | -93.73                                            | -189.19                                       | 2.30                      | -82.27                                                                   |
| Contributions to total energy   |                                                   |                                                   |                                               |                           |                                                                          |
| Valence energy (diagonal terms) |                                                   |                                                   |                                               |                           |                                                                          |
| Bond                            | 0.00                                              | 0.00                                              | 0.00                                          | –                         | 0.00                                                                     |
| Angle                           | 0.00                                              | 0.00                                              | 0.00                                          | –                         | 0.00                                                                     |
| Torsion                         | 0.00                                              | 0.00                                              | 0.00                                          | –                         | 0.00                                                                     |
| Inversion                       | 0.00                                              | 0.00                                              | 0.00                                          | –                         | 0.00                                                                     |
| Non-bond energy                 |                                                   |                                                   |                                               |                           |                                                                          |
| Hydrogen bond                   | 0.00                                              | -5.99                                             | -5.99                                         | –                         | -2.60                                                                    |
| van der Waals                   | -94.94                                            | -87.70                                            | -182.63                                       | –                         | -79.42                                                                   |
| Long range correction           | -0.53                                             | -0.04                                             | -0.57                                         | –                         | -0.25                                                                    |

<sup>a</sup>Calculated from total energy and each energy contribution summarized in Table S3. <sup>b</sup>The molecule–substrate interaction energy calculated as follows,  $E_{\text{mol-sub}} = E_{\text{monomer+HOPG}} - (E_{\text{monomer}} + E_{\text{HOPG}})$ . <sup>c</sup>The molecule–molecule interaction energy calculated as follows,  $E_{\text{mol-mol}} = \{E_{\text{ordering+HOPG}} - (E_{\text{defect}} + E_{\text{monomer}}) - E_{\text{mol-sub}}\}/2$ . <sup>d</sup>The adsorption energy calculated as follows,  $E_{\text{ads}} = E_{\text{mol-sub}} + E_{\text{mol-mol}}$ . <sup>e</sup>The unit area occupied by one molecule of **1-Fb** on the surface determined by STM measurement at the PO/HOPG interface ( $a = 4.6$  nm,  $b = 0.50$  nm,  $\alpha = 89^\circ$ ). <sup>f</sup>The adsorption energy per unit area calculated as follows,  $E_{\text{ads per area}} = E_{\text{ads}}/S$ . Other contributions such as (1) effects of entropy and (2) solvent interactions were not taken into account in this calculation.

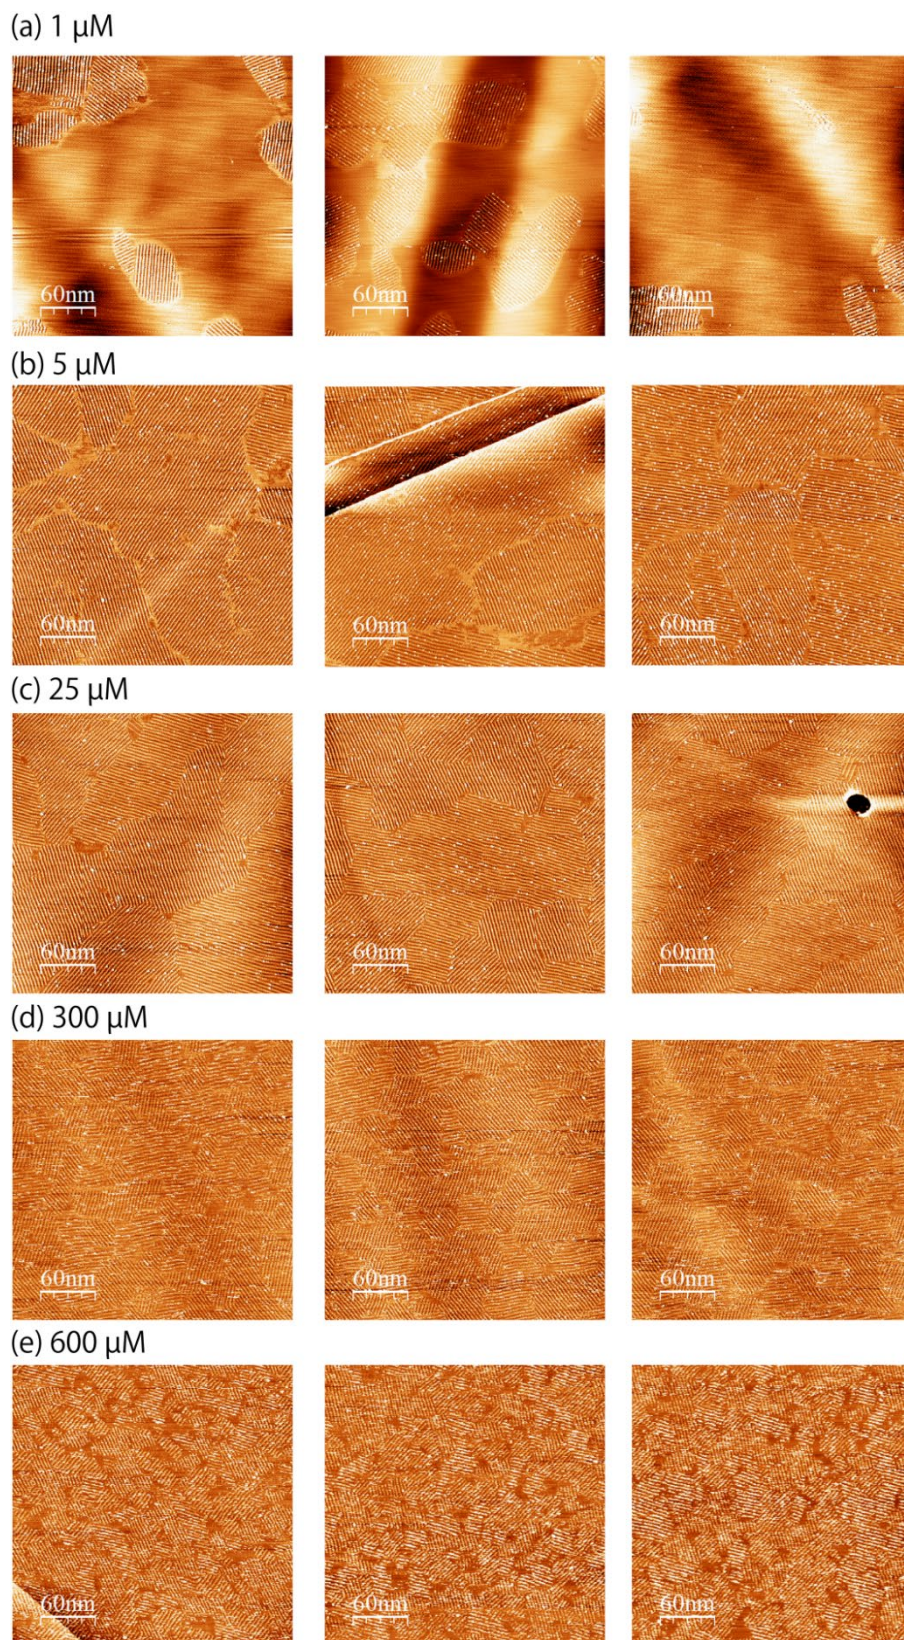

**Figure S4.** Representative STM images of **1-Fb** at different concentration at OA–HOPG interface ( $I_{\text{set}} = 20$  pA,  $V_{\text{bias}} = -800$  mV,  $300 \times 300 \text{ nm}^2$ ). The concentration of **1-Fb** was (a) 1  $\mu\text{M}$ , (b) 5  $\mu\text{M}$ , (c) 25  $\mu\text{M}$ , (d) 300  $\mu\text{M}$ , and (e) 600  $\mu\text{M}$  respectively.

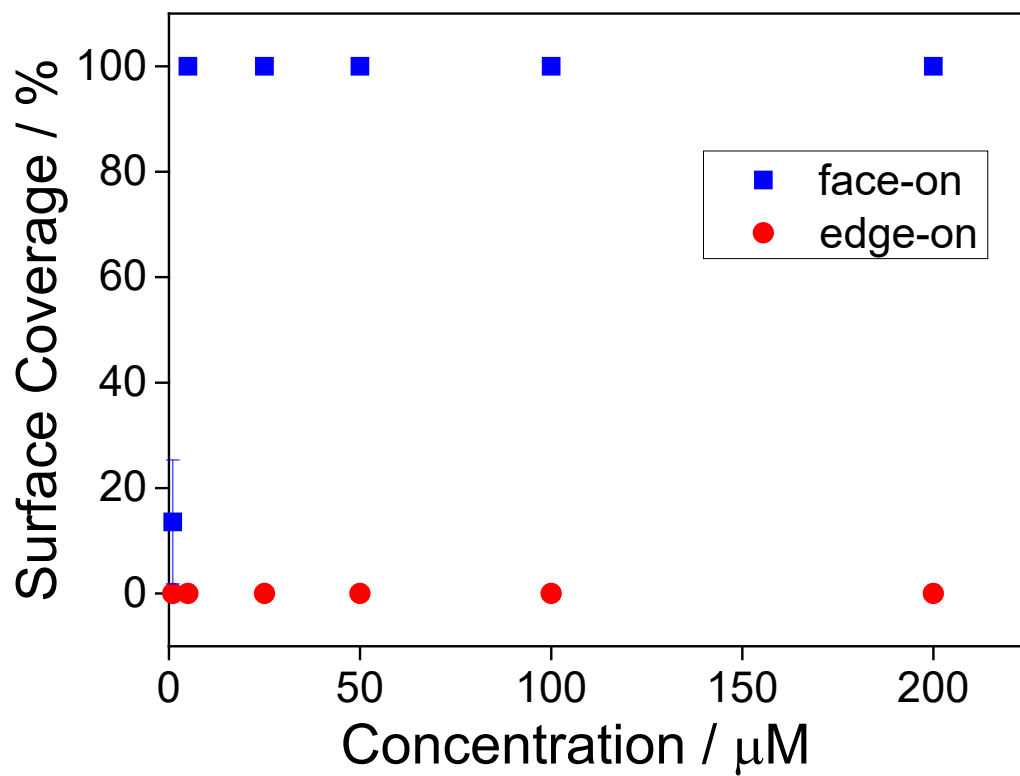

**Figure S5.** Surface coverage plot of **1-Fb** at the OA-HOPG interface depending on concentration. Blue square and red circle represent the face-on and edge-on orderings, respectively.

(a) 25  $\mu\text{M}$

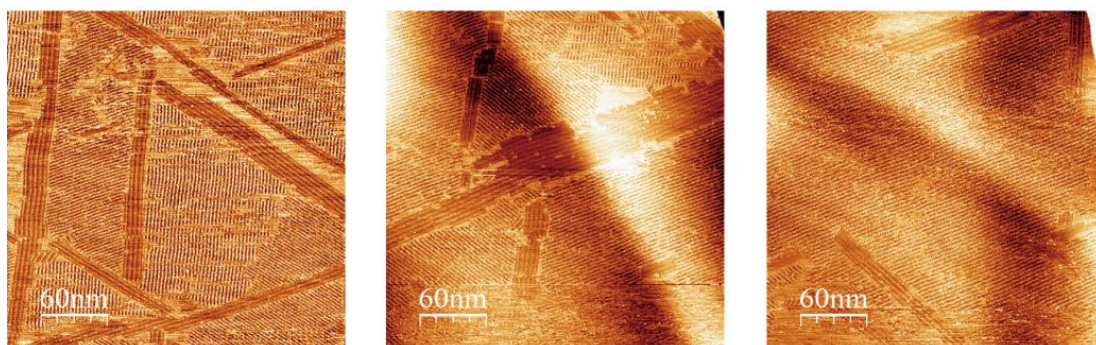

(b) 50  $\mu\text{M}$

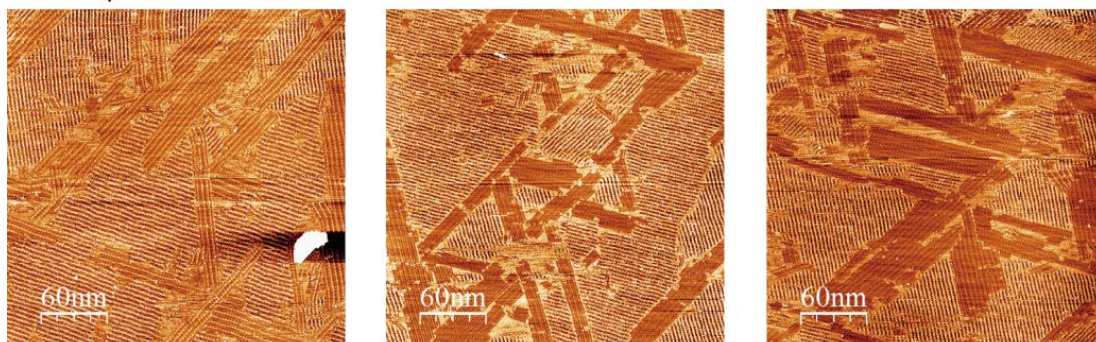

(c) 75  $\mu\text{M}$

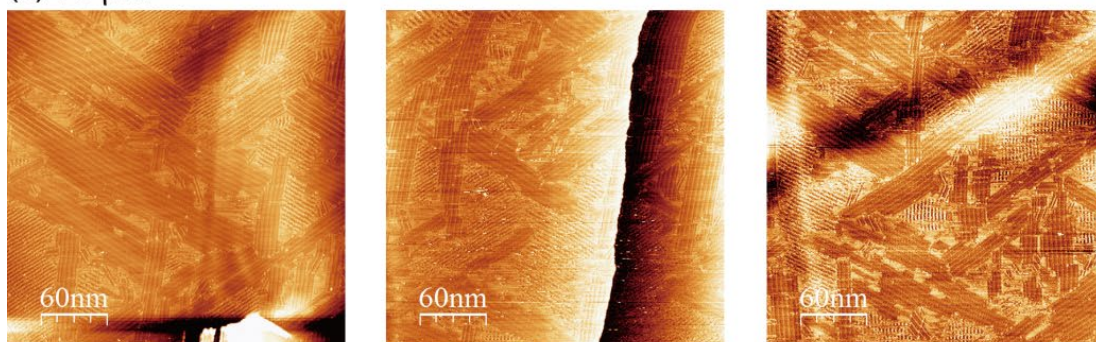

(d) 100  $\mu\text{M}$

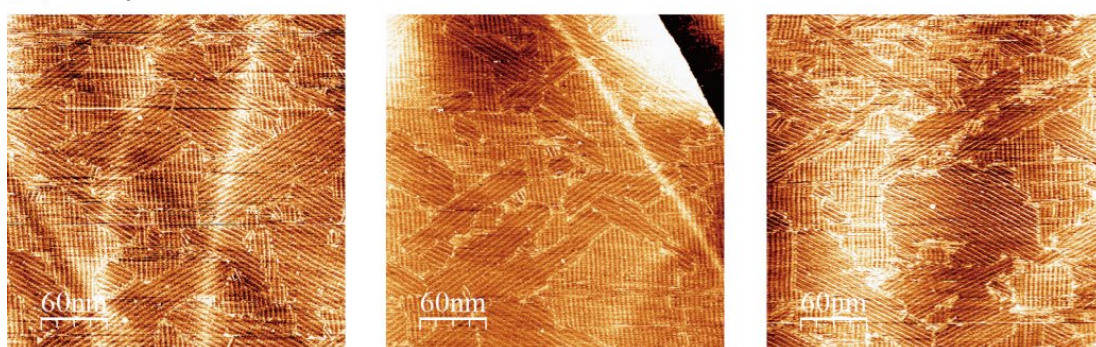

**Figure S6.** Representative STM images of **1-Fb** at different concentration at PO–HOPG interface ( $I_{\text{set}} = 20$  pA,  $V_{\text{bias}} = -800$  mV,  $300 \times 300$  nm<sup>2</sup>). The concentration of **1-Fb** was (a) 25  $\mu\text{M}$ , (b) 50  $\mu\text{M}$ , (c) 75  $\mu\text{M}$ , and (d) 100  $\mu\text{M}$  respectively. The statistical data to determine the averaged surface coverage of 2D ordering at a concentration was summarized in Table S6.

**Table S6.** Concentration dependence of surface coverage for the **1-Fb** using PO as a liquid phase<sup>a</sup>

| entry               | 10 $\mu$ M     |                | 25 $\mu$ M     |                | 50 $\mu$ M     |                | 75 $\mu$ M     |                | 100 $\mu$ M    |                | 150 $\mu$ M    |                |
|---------------------|----------------|----------------|----------------|----------------|----------------|----------------|----------------|----------------|----------------|----------------|----------------|----------------|
|                     | f <sup>b</sup> | e <sup>c</sup> |
| 1                   | 14.2           | 0.0            | 67.6           | 21.6           | 39.1           | 49.0           | 8.9            | 82.5           | 0              | 100            | 0              | 100            |
| 2                   | 17.4           | 4.1            | 66.5           | 17.8           | 42.5           | 36.7           | 14.9           | 79.3           | 0              | 100            | 0              | 100            |
| 3                   | 35.8           | 1.8            | 50.4           | 27.3           | 53.5           | 34.5           | 16.4           | 75.3           | 0              | 100            | 0              | 100            |
| 4                   | 4.5            | 3.2            | 48.2           | 23.2           | 39.6           | 42.4           | 18.6           | 74.4           | 0              | 100            | 0              | 100            |
| 5                   | 10.7           | 2.0            | 78.0           | 9.4            | 37.7           | 37.4           | 16.4           | 76.1           | 0              | 100            | 0              | 100            |
| mean /%             | 16.5           | 2.2            | 58.2           | 22.5           | 42.5           | 40.0           | 15.0           | 77.5           | 0              | 100            | 0              | 100            |
| SD <sup>d</sup> / % | 11.8           | 1.6            | 10.3           | 3.9            | 6.4            | 5.8            | 3.7            | 3.3            | 0              | 0              | 0              | 0              |

<sup>a</sup>Obtained from STM measurements at the phenyloctane (PO)–HOPG interface. <sup>b</sup>Surface coverage of face-on type ordering. <sup>c</sup>Surface coverage of edge-on type ordering. <sup>d</sup>SD: Standard deviation.

(a) 25  $\mu\text{M}$

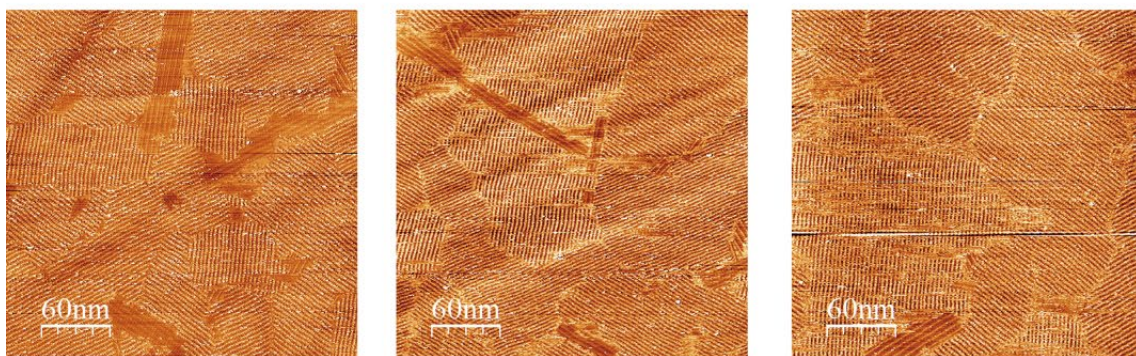

(b) 75  $\mu\text{M}$

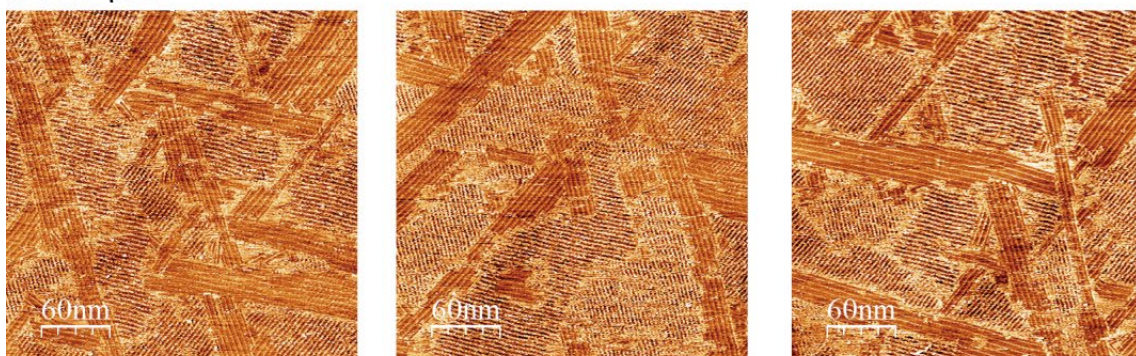

(c) 100  $\mu\text{M}$

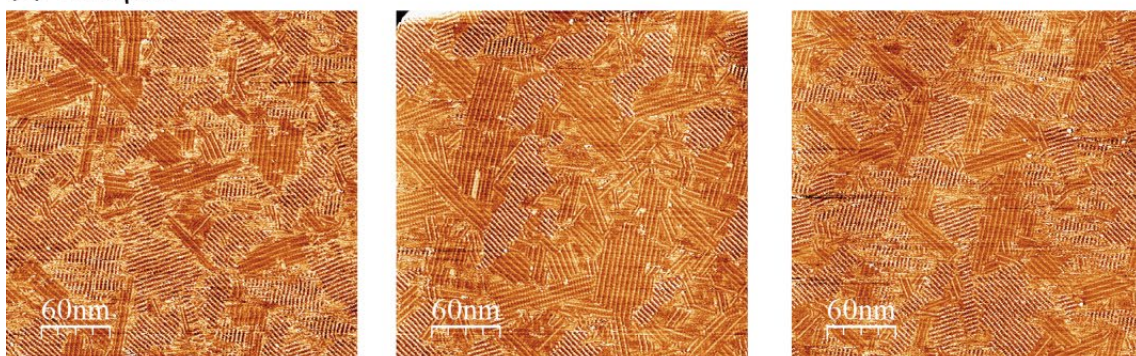

(d) 150  $\mu\text{M}$

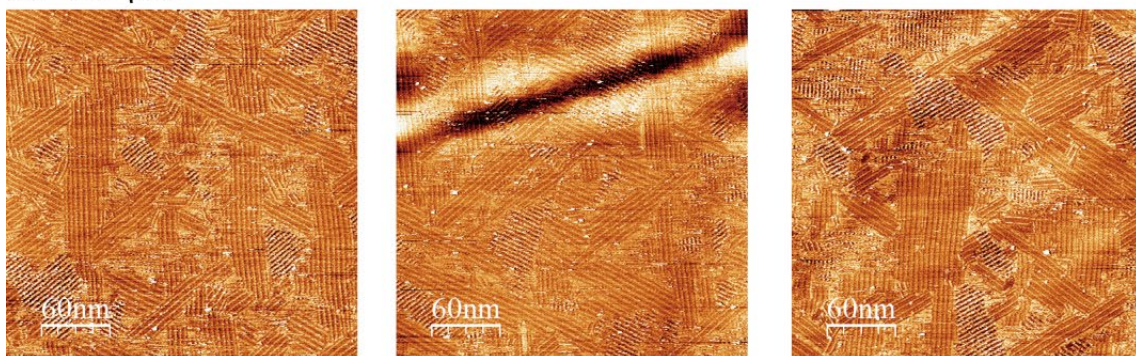

**Figure S7.** Representative STM images of **1-Fb** at different concentration at mixed solvent of OA/PO = 0.5/99.5 (v/v)–HOPG interface ( $I_{\text{set}} = 20 \text{ pA}$ ,  $V_{\text{bias}} = -800 \text{ mV}$ ,  $300 \times 300 \text{ nm}^2$ ). The concentration of **1-Fb** was (a) 25  $\mu\text{M}$ , (b) 75  $\mu\text{M}$ , (c) 100  $\mu\text{M}$ , and (d) 150  $\mu\text{M}$  respectively. The statistical data to determine the averaged surface coverage of 2D ordering at a concentration was summarized in Table S7.



**Table S7.** Concentration dependence of surface coverage for **1-Fb** using OA/PO (0.5/99.5 v/v) mixture<sup>a</sup>

| entry   | 5 $\mu$ M             |                       | 15 $\mu$ M            |                       | 25 $\mu$ M            |                       | 50 $\mu$ M            |                       | 75 $\mu$ M            |                       | 100 $\mu$ M           |                       | 125 $\mu$ M           |                       | 150 $\mu$ M           |                       |
|---------|-----------------------|-----------------------|-----------------------|-----------------------|-----------------------|-----------------------|-----------------------|-----------------------|-----------------------|-----------------------|-----------------------|-----------------------|-----------------------|-----------------------|-----------------------|-----------------------|
|         | <i>f</i> <sup>b</sup> | <i>e</i> <sup>c</sup> |
| 1       | 8.4                   | 0.0                   | 88.3                  | 3.7                   | 90.8                  | 7.0                   | 79.1                  | 18.3                  | 72.5                  | 27.5                  | 44.8                  | 26.3                  | 20.6                  | 48.0                  | 21.7                  | 72.3                  |
| 2       | 31.6                  | 0.0                   | 96.6                  | 0.0                   | 94.5                  | 3.5                   | 81.7                  | 12.6                  | 81.7                  | 18.3                  | 42.3                  | 29.4                  | 32.6                  | 44.0                  | 18.0                  | 77.4                  |
| 3       | 17.9                  | 0.0                   | 99.1                  | 0.26                  | 93.9                  | 4.6                   | 80.0                  | 15.2                  | 65.6                  | 34.3                  | 43.9                  | 25.1                  | 22.7                  | 46.1                  | 11.5                  | 83.9                  |
| 4       | 37.9                  | 0.0                   | 89.1                  | 1.7                   | 90.3                  | 8.3                   | 82.3                  | 13.9                  | 73.4                  | 26.6                  | 41.8                  | 22.0                  | 21.5                  | 44.1                  | 14.0                  | 79.7                  |
| 5       | 16.5                  | 0.0                   | 89.5                  | 0.41                  | 94.4                  | 3.2                   | 80.4                  | 12.8                  | 69.4                  | 30.6                  | 31.2                  | 21.3                  | 32.7                  | 37.2                  | 15.4                  | 80.2                  |
| 6       | 49.1                  | 0.0                   | 82.4                  | 1.2                   | 96.2                  | 3.7                   | 80.5                  | 7.9                   | 69.4                  | 30.6                  | 30.1                  | 24.3                  | 18.6                  | 50.5                  | 23.3                  | 73.3                  |
| 7       | 24.2                  | 0.0                   | 92.8                  | 1.4                   | 94.6                  | 3.8                   |                       |                       | 74.1                  | 25.8                  | 36.7                  | 28.0                  | 22.5                  | 39.7                  | 14.3                  | 76.9                  |
| 8       | 51.4                  | 0.0                   | 92.6                  | 1.5                   | 97.1                  | 1.5                   |                       |                       | 64.2                  | 33.4                  |                       |                       |                       |                       | 13.8                  | 77.9                  |
| 9       | 30.8                  | 0.0                   |                       |                       | 95.8                  | 2.3                   |                       |                       |                       |                       |                       |                       |                       |                       |                       |                       |
| 10      | 48.4                  | 0.0                   |                       |                       | 97.4                  | 0.9                   |                       |                       |                       |                       |                       |                       |                       |                       |                       |                       |
| 11      |                       |                       |                       |                       | 94.4                  | 3.1                   |                       |                       |                       |                       |                       |                       |                       |                       |                       |                       |
| Mean /% | 31.6                  | 0.0                   | 91.3                  | 1.3                   | 94.5                  | 3.8                   | 80.7                  | 13.4                  | 71.3                  | 28.4                  | 38.8                  | 25.2                  | 24.5                  | 44.2                  | 16.5                  | 77.7                  |
| SD / %  | 15                    | 0.0                   | 5.2                   | 1.2                   | 2.3                   | 2.2                   | 1.2                   | 3.4                   | 5.5                   | 5.1                   | 5.9                   | 3.0                   | 5.8                   | 4.6                   | 4.1                   | 3.7                   |

<sup>a</sup>Obtained from STM measurements at liquid–HOPG interface where a mixed solvent of octanoic acid (OA)/phenyloctane (PO) = 0.5/99.5 (v/v) was used as a liquid phase. <sup>b</sup>Surface coverage of face-on type ordering. <sup>c</sup>Surface coverage of edge-on type ordering. <sup>d</sup>SD: Standard deviation.

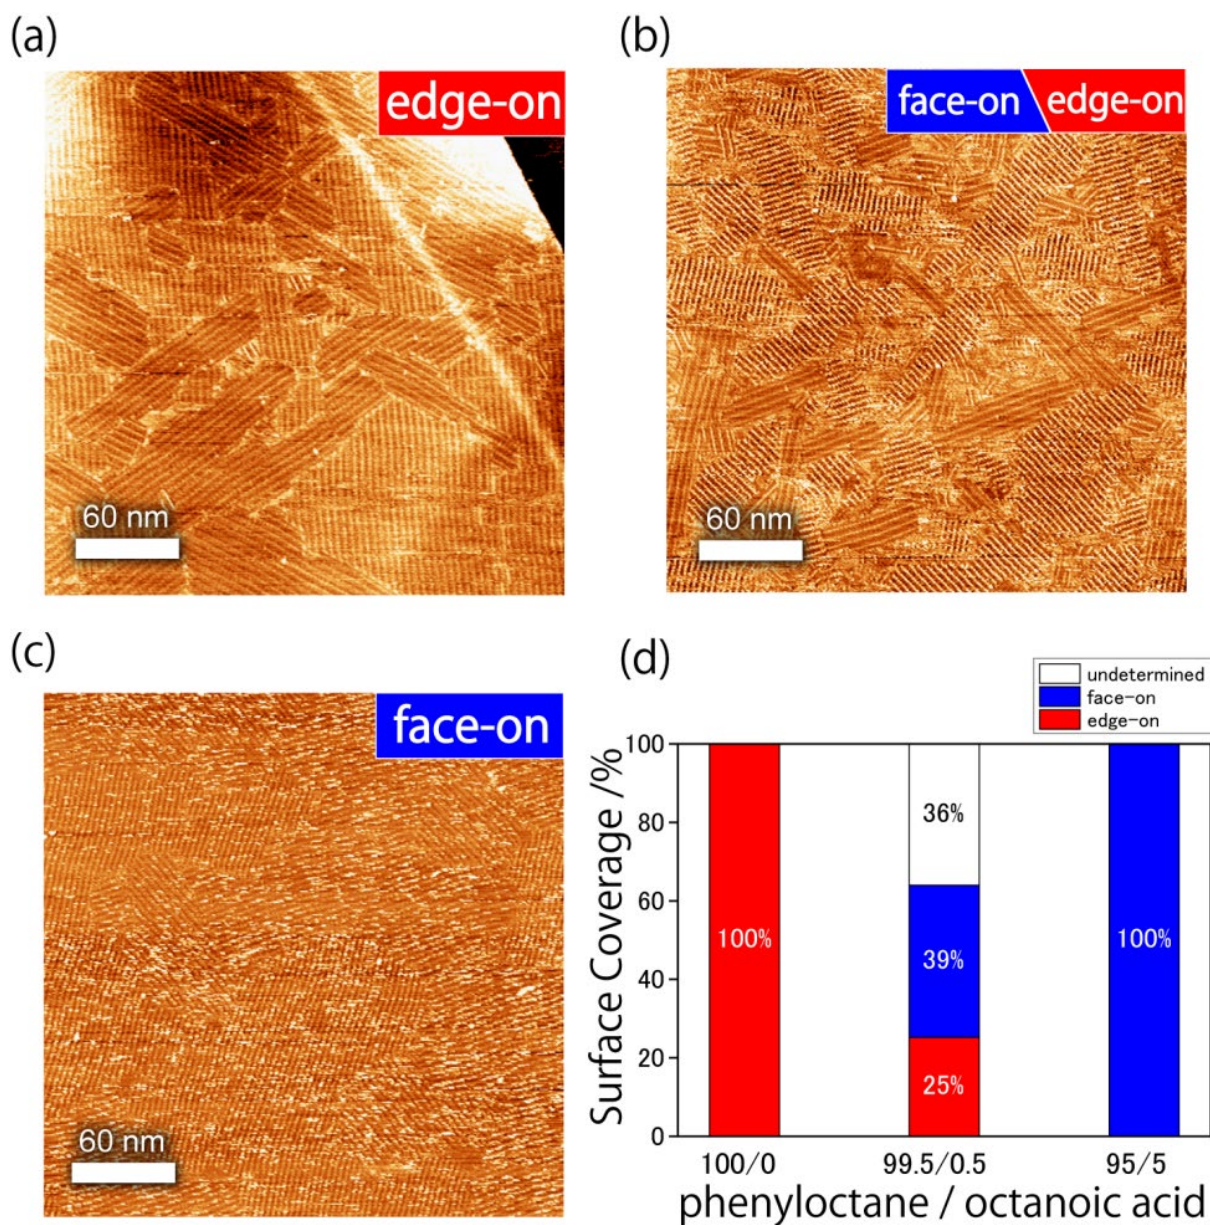

**Figure S8.** Representative STM images ( $I_{\text{set}} = 20 \text{ pA}$ ,  $V_{\text{bias}} = -800 \text{ mV}$ ,  $300 \times 300 \text{ nm}^2$ ) of **1-Fb** at mixed solvent of OA/PO (a) 0/100, (b) 0.5/99.5, and (c) 5/95 (v/v) respectively. The concentration of **1-Fb** was  $100 \mu\text{M}$ . (d) Bar graph showing fractional surface coverage depending on the fraction of the two solvents.

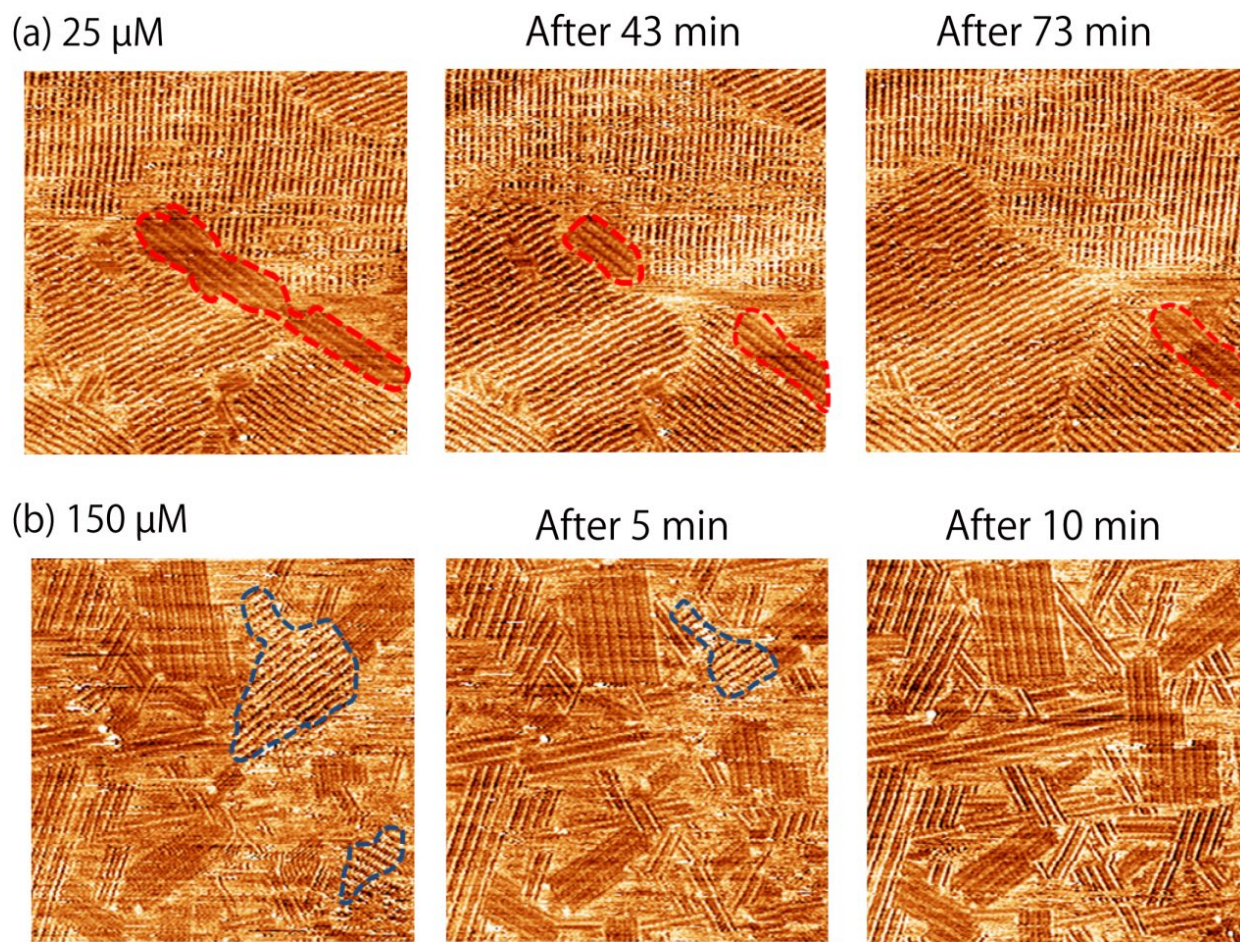

**Figure S9.** Real-time STM images ( $I_{\text{set}} = 20 \text{ pA}$ ,  $V_{\text{bias}} = -800 \text{ mV}$ ,  $150 \times 150 \text{ nm}^2$ ) of **1-Fb** at mixed solvent of OA/PO = 0.5/99.5. (a) Concentration of **1-Fb** was  $25 \text{ } \mu\text{M}$ . Red dashed line denotes the surface area in which the edge-on ordering was clearly observed. (b) Concentration of **1-Fb** was  $150 \text{ } \mu\text{M}$ . Blue dashed line denotes the surface area in which the face-on ordering was clearly observed. Interestingly, timescale of the disappearance of edge-on ordering domains (at  $25 \text{ } \mu\text{M}$ , more than 70 min) was much slower than that of the face-on ordering (at  $150 \text{ } \mu\text{M}$ , within 10 min). This is likely attributed to a strong molecule–molecule interactions in the edge-on arrangement with the  $\pi$ - $\pi$  staking structure of porphyrin cores, which could slow down the rate of desorption at the boundary of ordered domains.

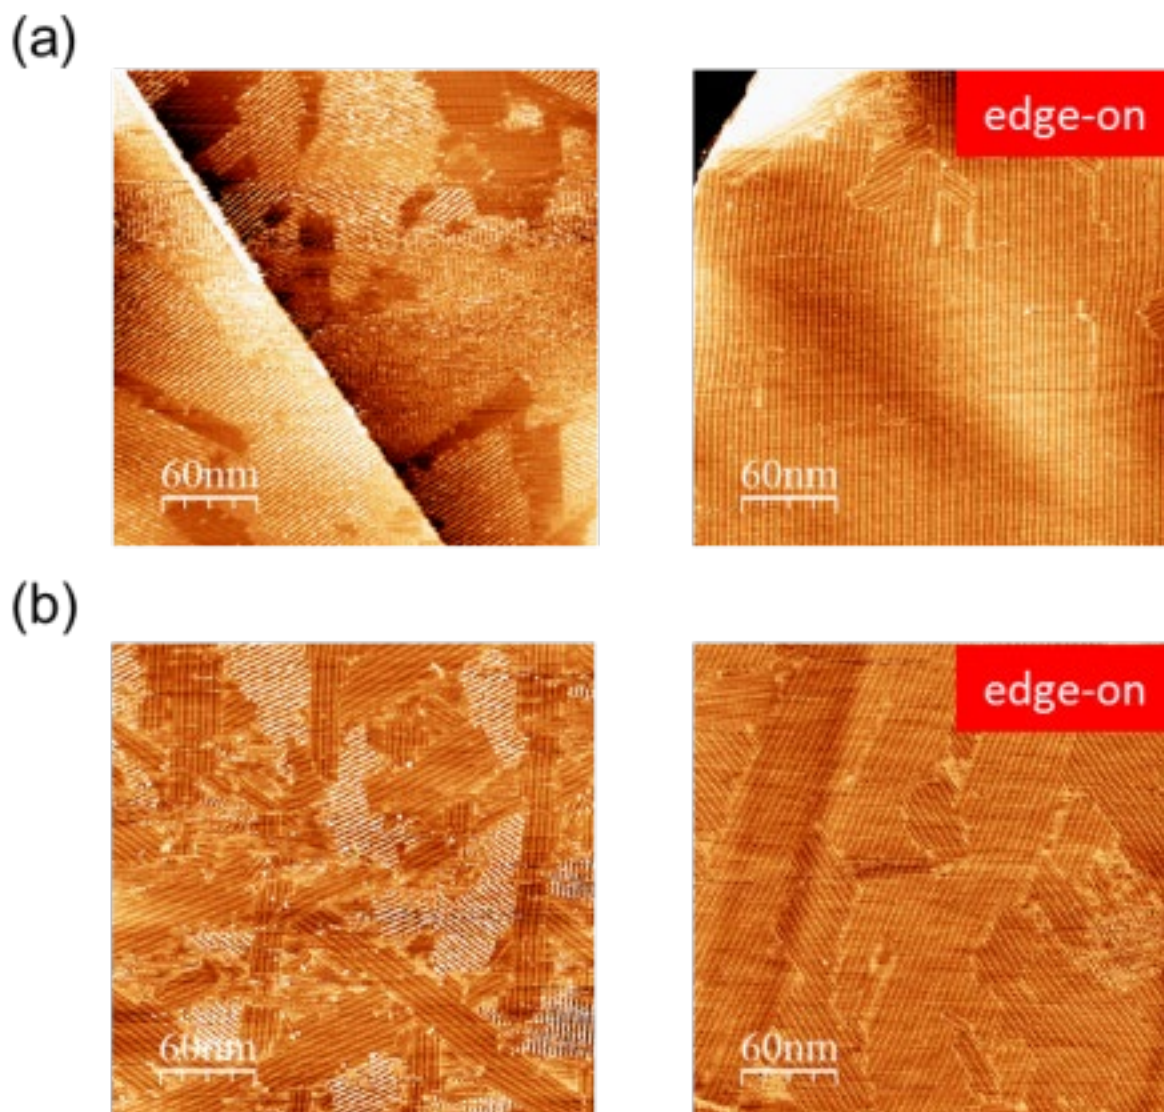

**Figure S10.** STM images ( $I_{\text{set}} = 20 \text{ pA}$ ,  $V_{\text{bias}} = -800 \text{ mV}$ ,  $300 \times 300 \text{ nm}^2$ ) of **1-Fb** at mixed solvent of OA/PO = 0.5/99.5. Concentration of **1-Fb** was (a)  $50 \text{ }\mu\text{M}$  and (b)  $125 \text{ }\mu\text{M}$ . Left images represent 2D ordering formed before annealing, i.e., STM images were recorded just after deposition of solution on HOPG substrate. Right images represent those after annealing at  $60 \text{ }^\circ\text{C}$  for several minutes. All STM images were recorded at room temperature. It is noted that the size of 2D ordering domains significantly depended both on annealing treatment and concentration condition; (1) the domain size got clearly larger than STM scan size ( $> 300 \times 300 \text{ nm}^2$ ) after annealing at  $50 \text{ }\mu\text{M}$ , and (2) the domain size tended to be small at high concentrations even after annealing at  $60 \text{ }^\circ\text{C}$ .

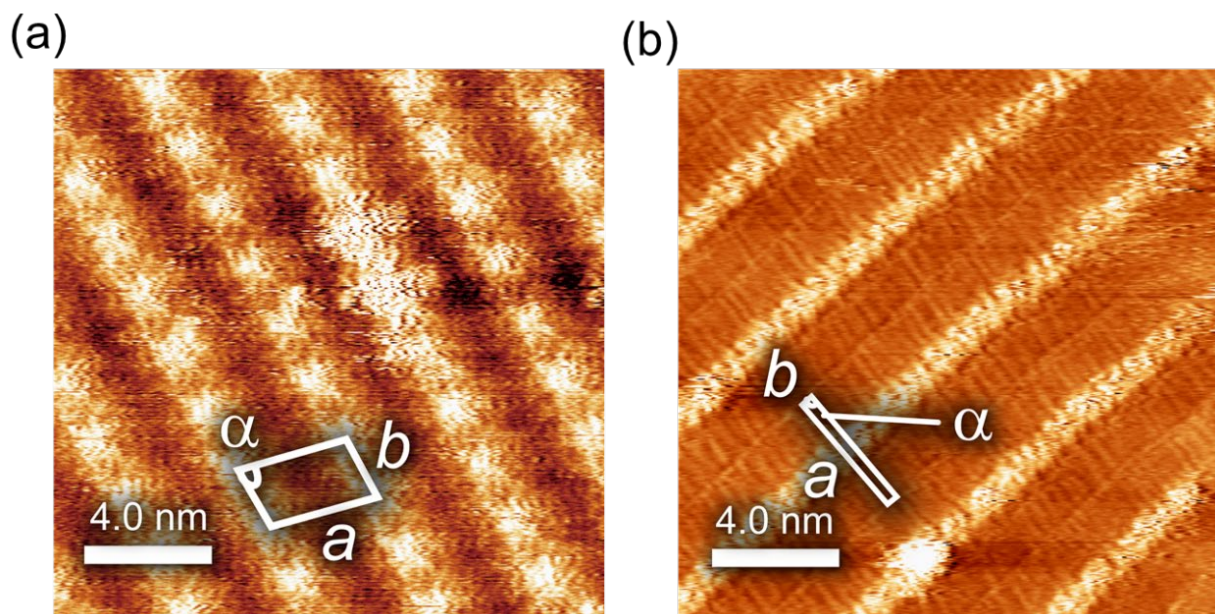

**Figure S11.** High-resolution STM images of **2-Fb** at the (a) octanoic acid- and (b) phenyloctane-graphite interface ( $c = 100 \mu\text{M}$ ,  $I_{\text{set}} = 20 \text{ pA}$ ,  $V_{\text{bias}} = -0.80 \text{ V}$ ).

20  $\mu\text{M}$

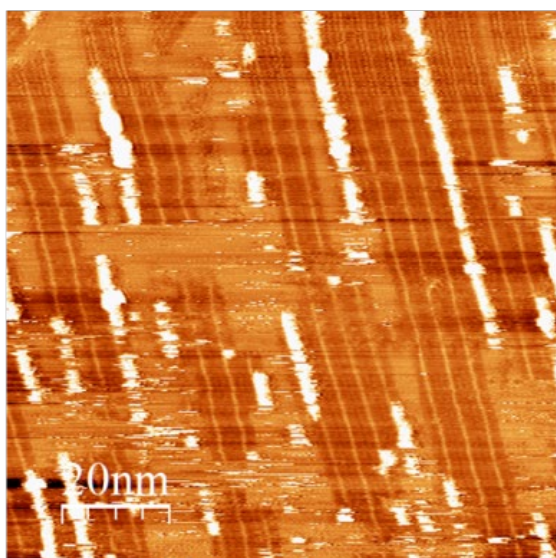

60  $\mu\text{M}$

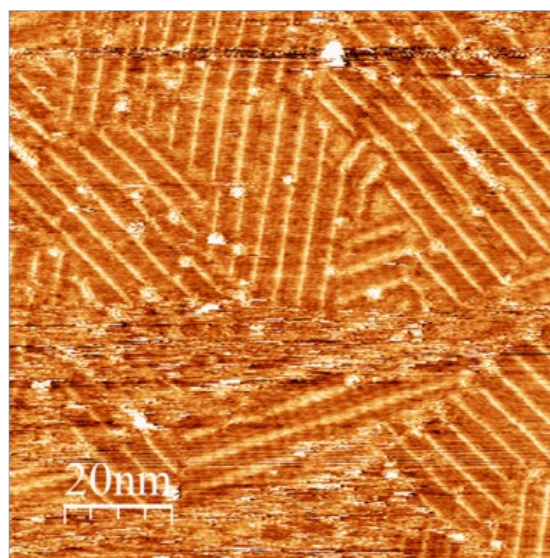

**Figure S12.** Representative STM images of **2-Fb** at the PO-HOPG interface at concentrations of  $20 \mu\text{M}$  (left) and  $60 \mu\text{M}$  (right) ( $I_{\text{set}} = 20 \text{ pA}$ ,  $V_{\text{bias}} = -800 \text{ mV}$ ,  $100 \times 100 \text{ nm}^2$ ). The edge-on ordering was exclusively observed for **2-Fb** even at low concentration, i.e.,  $c = 20 \mu\text{M}$ , where surface coverage was not saturated.

### 3. NMR Data

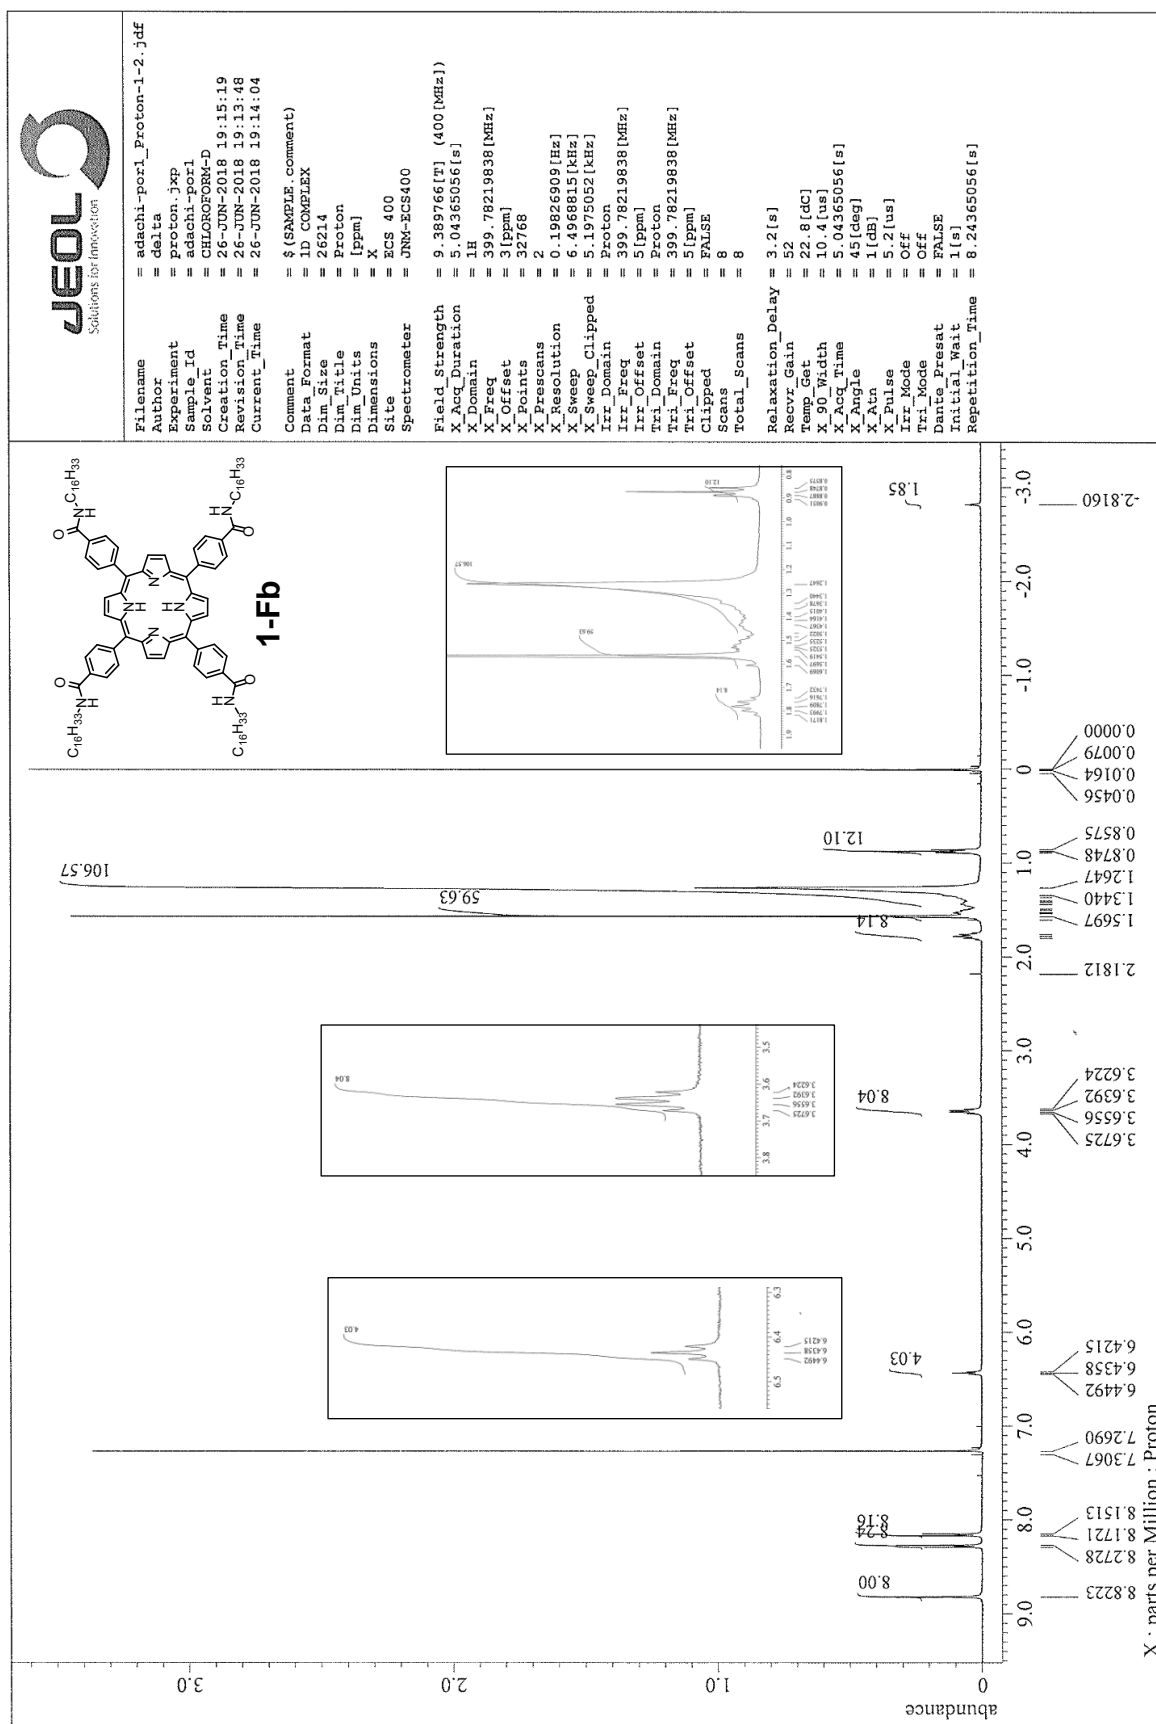

Figure S13. <sup>1</sup>H NMR spectra of 1-Fb (CDCl<sub>3</sub>, 400 MHz)

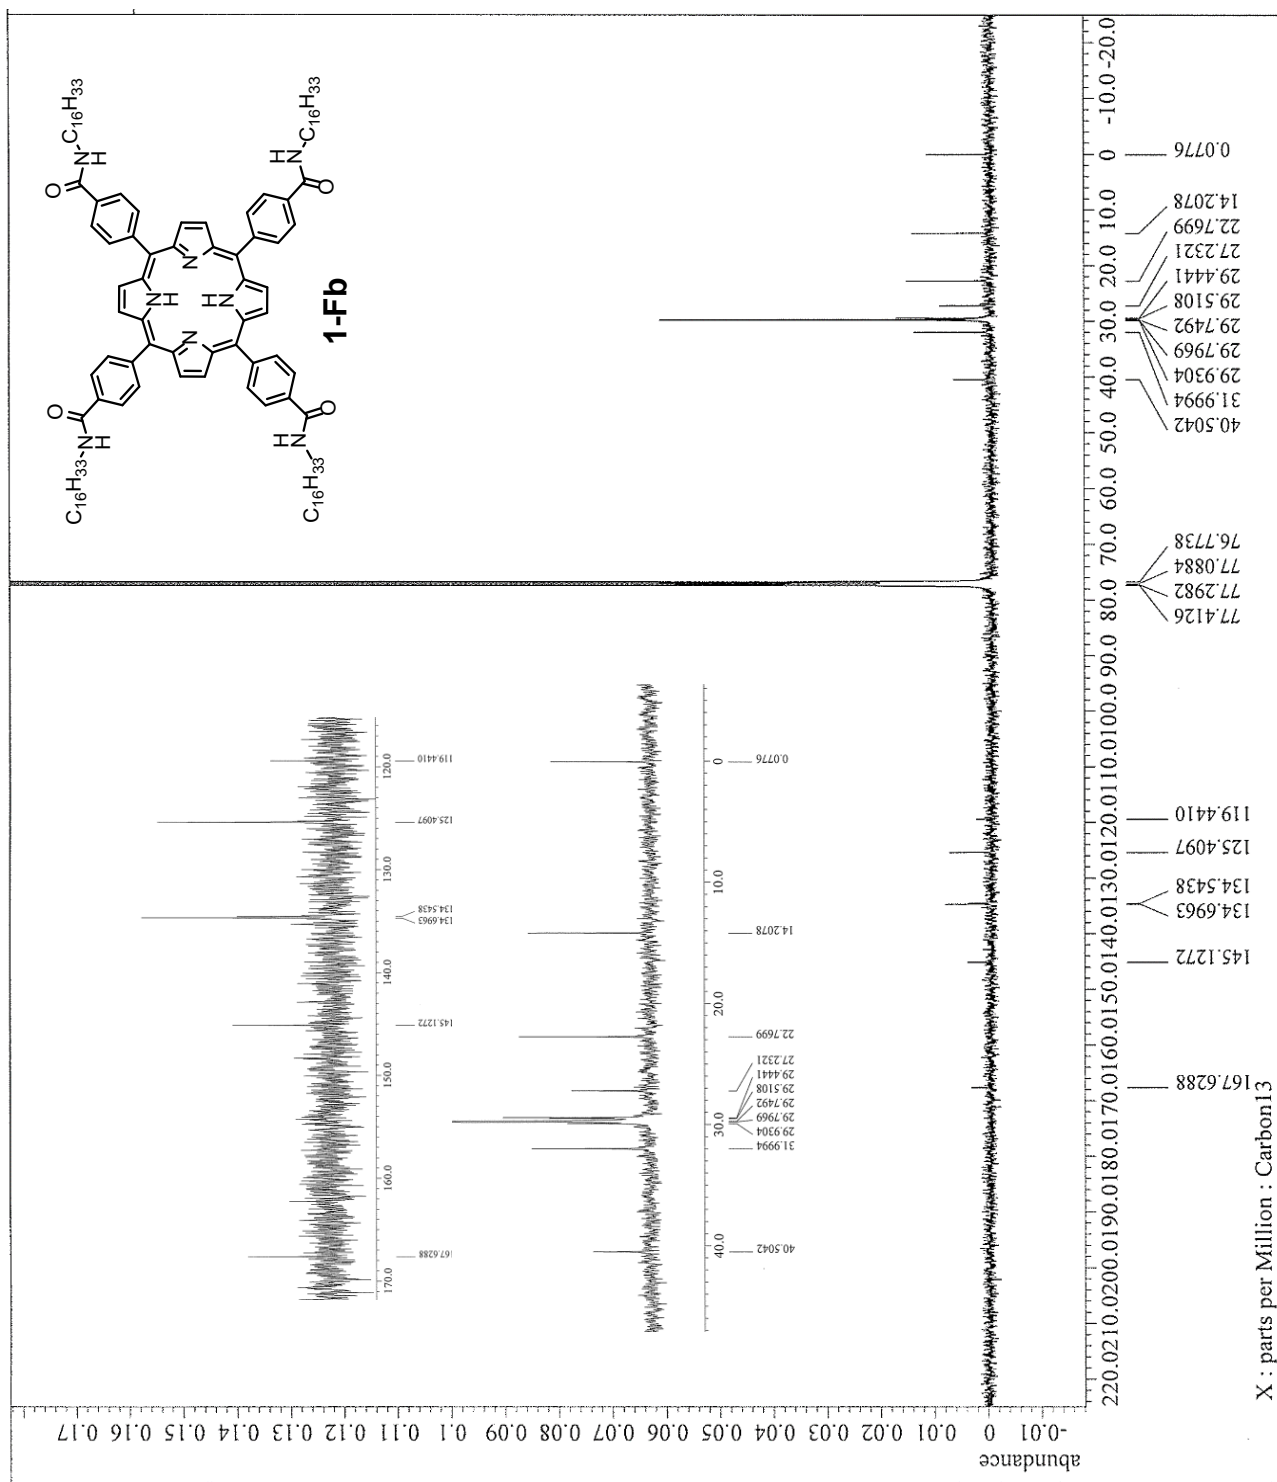

**Figure S14.**  $^{13}\text{C}$  NMR spectra of **1-Fb** ( $\text{CDCl}_3$ , 101 MHz)

```

Filename = adachi-compound11_2_Proton
Author = delta
Experiment = Proton_jxp
Sample_Id = adachi-compound11_2
Solvent = CHLOROFORM-D
Creation_Time = 17-OCT-2016 16:57:47
Revision_Time = 17-OCT-2016 16:58:18
Current_Time = 17-OCT-2016 16:58:40

Data_Format = 1D_COMPLEX
Dim_Size = 26214
Dim_Title = Proton
Dim_Units = [ppm]
Dimensions = X
Site = ECS 400
Spectrometer = JNM-ECS400

Field_Strength = 9.389766[T] (400 [MHz])
X_Acq_Duration = 5.46308096[s]
X_Domain = 1H
X_Freq = 399.78219838 [MHz]
X_Offset = 5 [ppm]
X_Points = 32768
X_Prescans = 2
X_Resolution = 0.18304689 [Hz]
X_Sweep_Clippped = 5.99808061 [kHz]
X_Sweep_Domain = 4.79846449 [kHz]
Irr_Domain = Proton
Irr_Freq = 399.78219838 [MHz]
Irr_Offset = 5 [ppm]
Tri_Domain = Proton
Tri_Freq = 399.78219838 [MHz]
Tri_Offset = 5 [ppm]
Clipped = FALSE
Scans = 8
Total_Scans = 8

Relaxation_Delay = 3.2[s]
Recvr_Gain = 58
Temp_Get = 21.5 [dC]
X_90_Width = 11.1 [us]
X_Acq_Time = 5.46308096 [s]
X_Angle = 45 [deg]
X_Atn = 1 [dB]
X_Pulse = 5.55 [us]
Irr_Mode = Off
Tri_Mode = Off
Data_Preset = FALSE
Initial_Wait = 1 [s]
Repetition_Time = 8.66308096 [s]
  
```

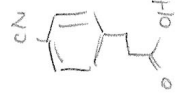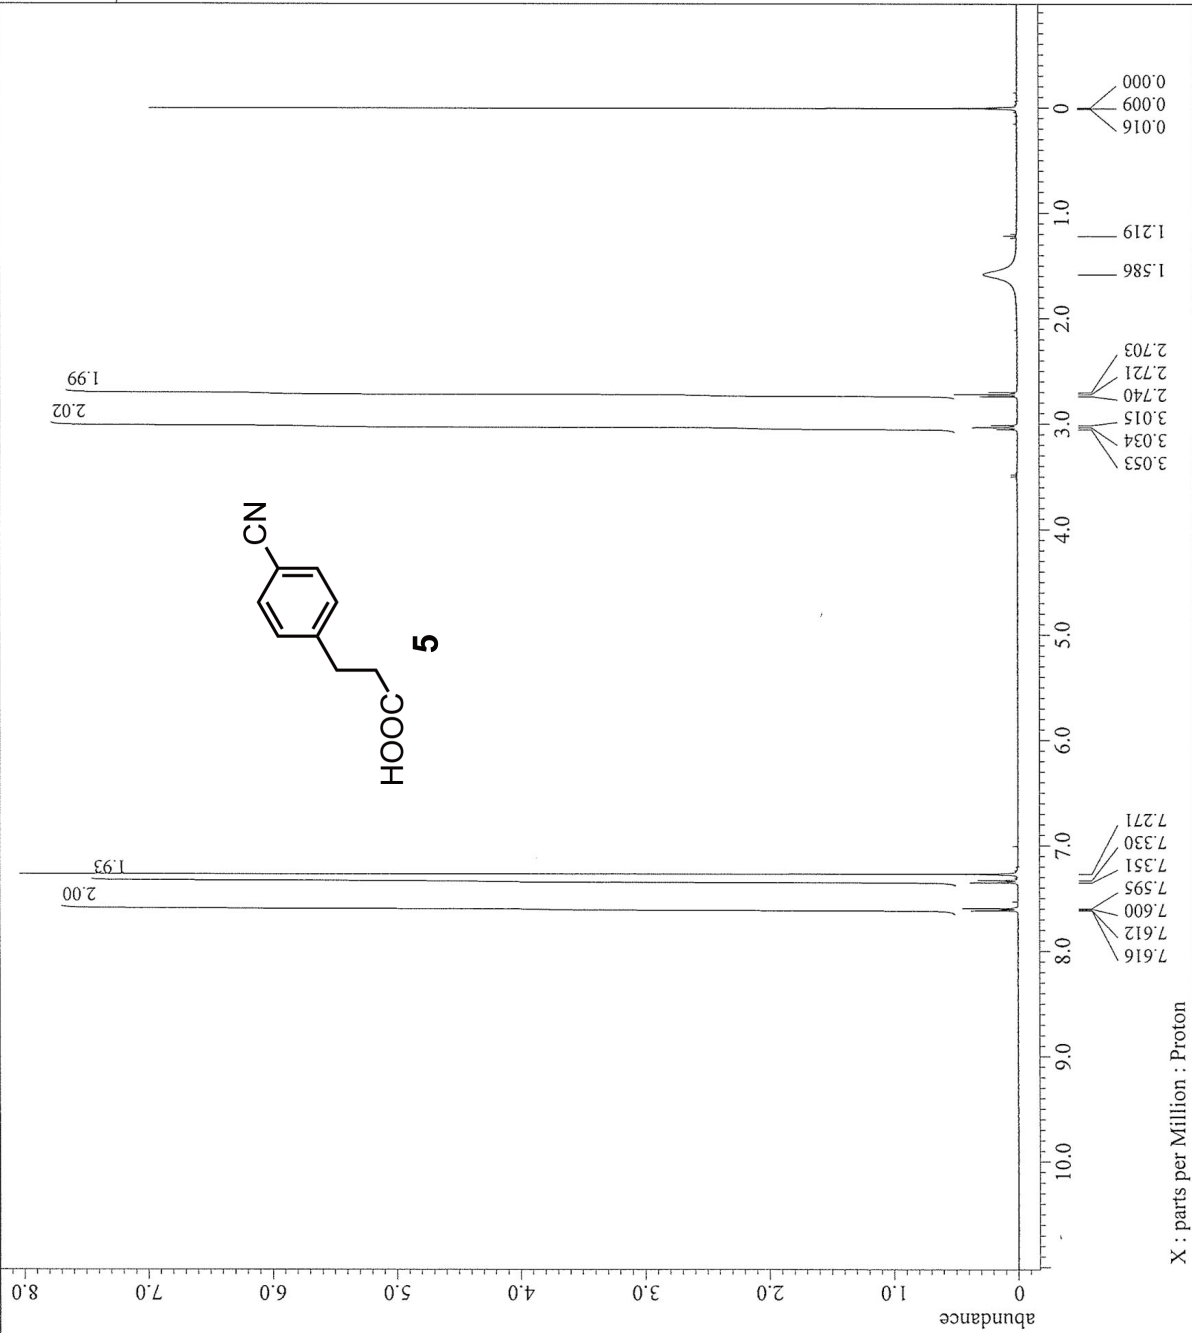

Figure S15. <sup>1</sup>H NMR spectra of **5** (CDCl<sub>3</sub>, 400 MHz)



```

Filename = adachi-compound13_Proton-1
Author = delta
Experiment = proton_jmp
Sample_Id = adachi-compound13
Solvent = CHLOROFORM-D
Creation_Time = 25-OCT-2016 11:33:24
Revision_Time = 25-OCT-2016 11:34:00
Current_Time = 25-OCT-2016 11:34:26

Data Format = 1D COMPLEX
Dim Size = 26214
Dim_Title = Proton
Dim_Units = [ppm]
Dimensions = X
Site = ECS 400
Spectrometer = JNM-EC400

Field Strength = 9.389766[T] (400 [MHz])
X_Acq_Duration = 5.46308096[s]
X_Domain = 1H
X_Freq = 399.78219838[MHz]
X_Offset = 5[ppm]
X_Points = 32768
X_Prescans = 2
X_Resolution = 0.18304689[Hz]
X_Sweep = 5.99808061[kHz]
X_Sweep_Clipped = 4.79846449[kHz]
Irr_Domain = Proton
Irr_Freq = 399.78219838[MHz]
Irr_Offset = 5[ppm]
Tri_Domain = Proton
Tri_Freq = 399.78219838[MHz]
Tri_Offset = 5[ppm]
Clipped = FALSE
Scans = 8
Total_Scans = 8

Relaxation_Delay = 3.2[s]
Recvr_Gain = 60
Temp_Get = 21.5[degC]
X_90_Width = 11.1[us]
X_Acq_Time = 5.46308096[s]
X_Angle = 45[deg]
X_Atn = 1[dB]
X_Pulse = 5.55[us]
Irr_Mode = Off
Tri_Mode = Off
Daute_Preset = FALSE
Initial_Wait = 1[s]
Repetition_Time = 8.66308096[s]
  
```

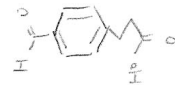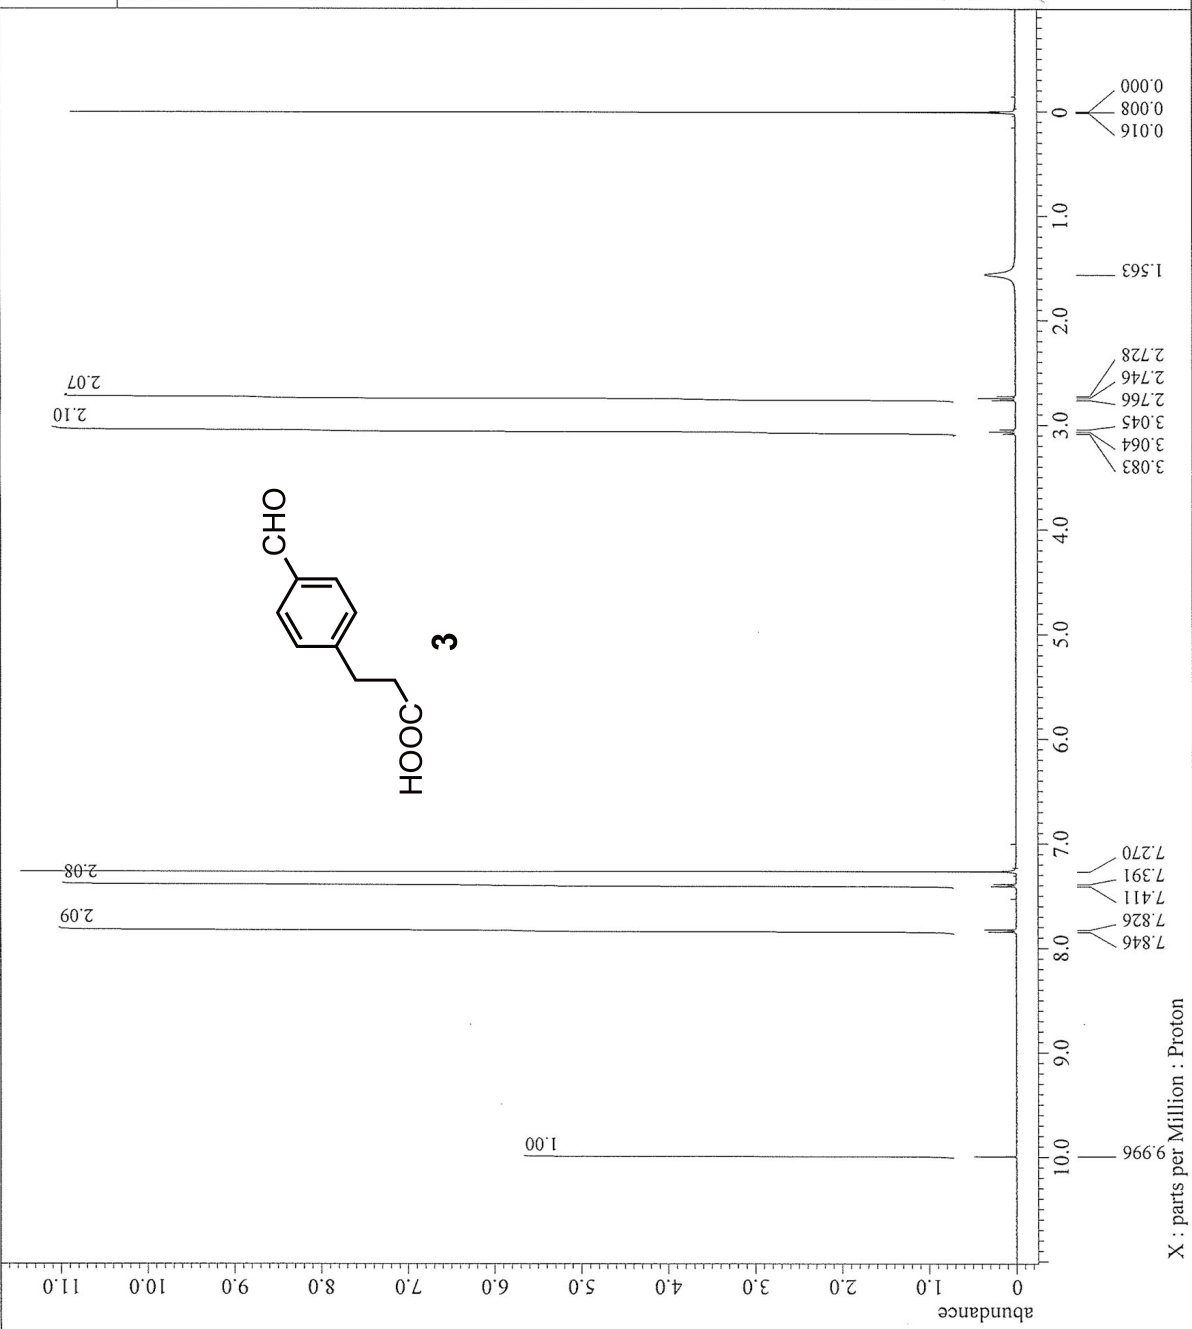

Figure S16. <sup>1</sup>H NMR spectra of **3** (CDCl<sub>3</sub>, 400 MHz)

```

Filename = adachi-porf6_Proton-1-6.jd
Author = delta
Experiment = proton_jxp
Sample_id = adachi-porf6
Solvent = DMSO-D6
Creation_Time = 26-OCT-2016 19:32:06
Revision_Time = 26-OCT-2016 19:34:29
Current_Time = 26-OCT-2016 19:34:43

Data Format = 1D COMPLEX
Dim Size = 26214
Dim Title = Proton
Dim Units = [ppm]
Dimensions = X
Site = ECS 400
Spectrometer = JNM-ECS400

Field Strength = 9.389766[T] (400 [MHz])
X_Acq_Duration = 5.04365056[s]
X_Domain = 1H
X_Freq = 399.78219838 [MHz]
X_Offset = 3 [ppm]
X_Points = 32768
X_Prescans = 2
X_Resolution = 0.19826909 [Hz]
X_Sweep = 6.4968815 [kHz]
X_Sweep_Clippped = 5.1975052 [kHz]
Irr_Domain = Proton
Irr_Freq = 399.78219838 [MHz]
Irr_Offset = 5 [ppm]
Tri_Domain = Proton
Tri_Freq = 399.78219838 [MHz]
Tri_Offset = 5 [ppm]
Clipped = FALSE
Scans = 8
Total_Scans = 8

Relaxation_Delay = 3.2 [s]
Recvr_Gain = 42
Temp_Get = 21.3 [dC]
X_90_Width = 11.1 [us]
X_Acq_Time = 5.04365056 [s]
X_Angle = 45 [deg]
X_Attn = 1 [dB]
X_Pulse = 5.55 [us]
Irr_Mode = Off
Tri_Mode = Off
Dante_Presat = FALSE
Initial_Wait = 1 [s]
Repetition_Time = 8.24365056 [s]
  
```

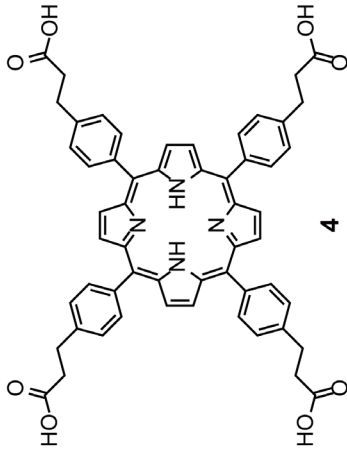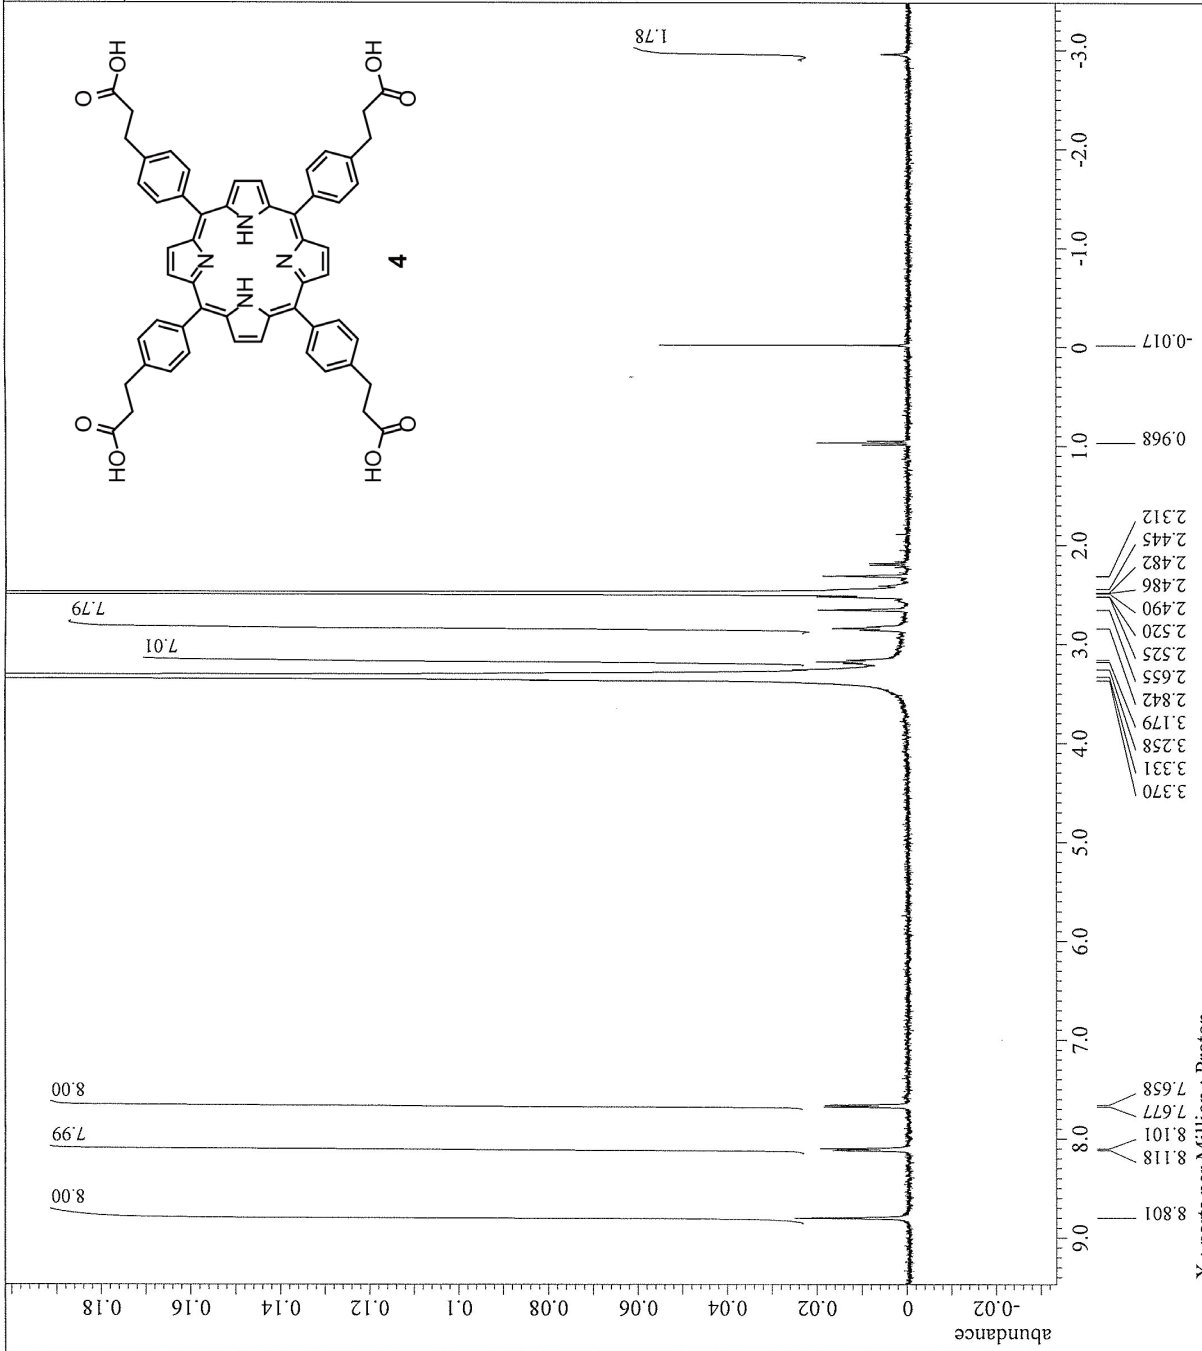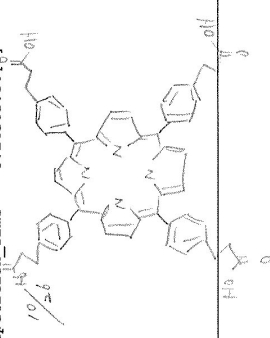

Figure S17. <sup>1</sup>H NMR of **4** (CDCl<sub>3</sub>, 400 MHz)

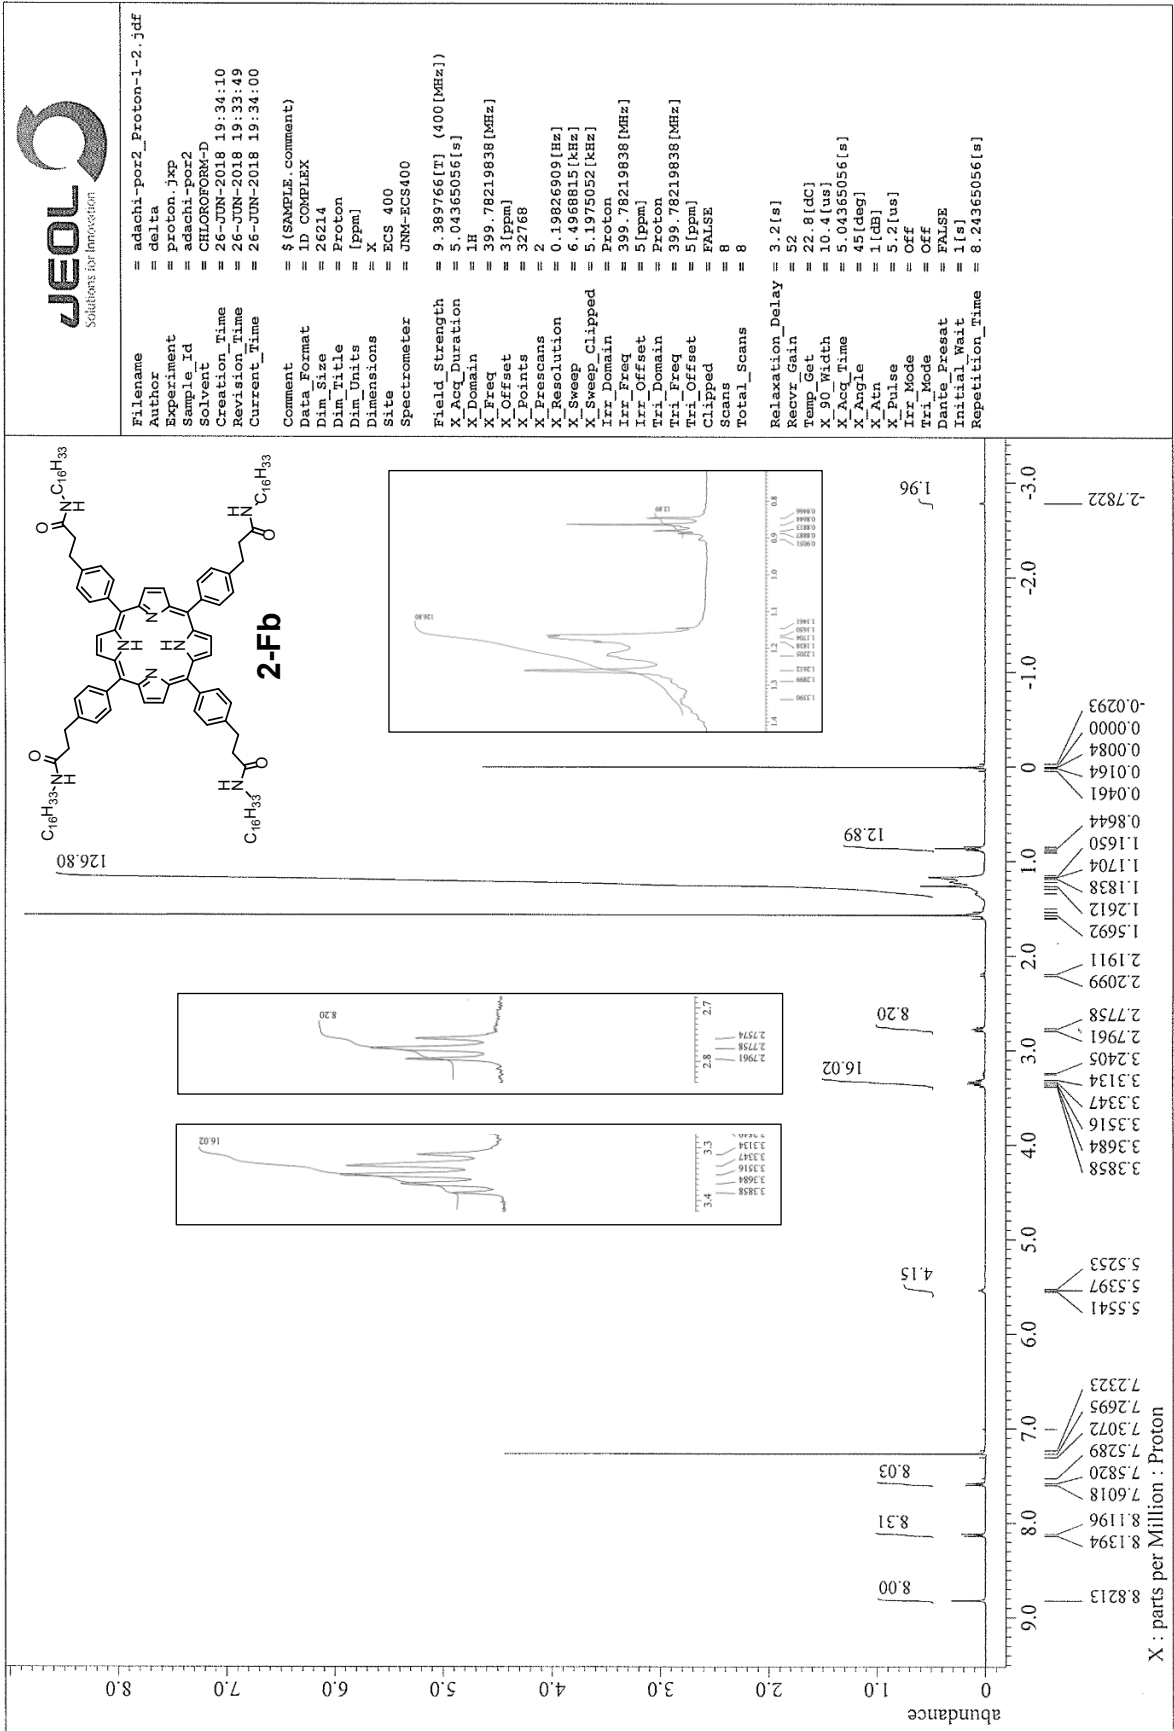

Figure S18. <sup>1</sup>H NMR spectra of 2-Fb (CDCl<sub>3</sub>, 400 MHz)

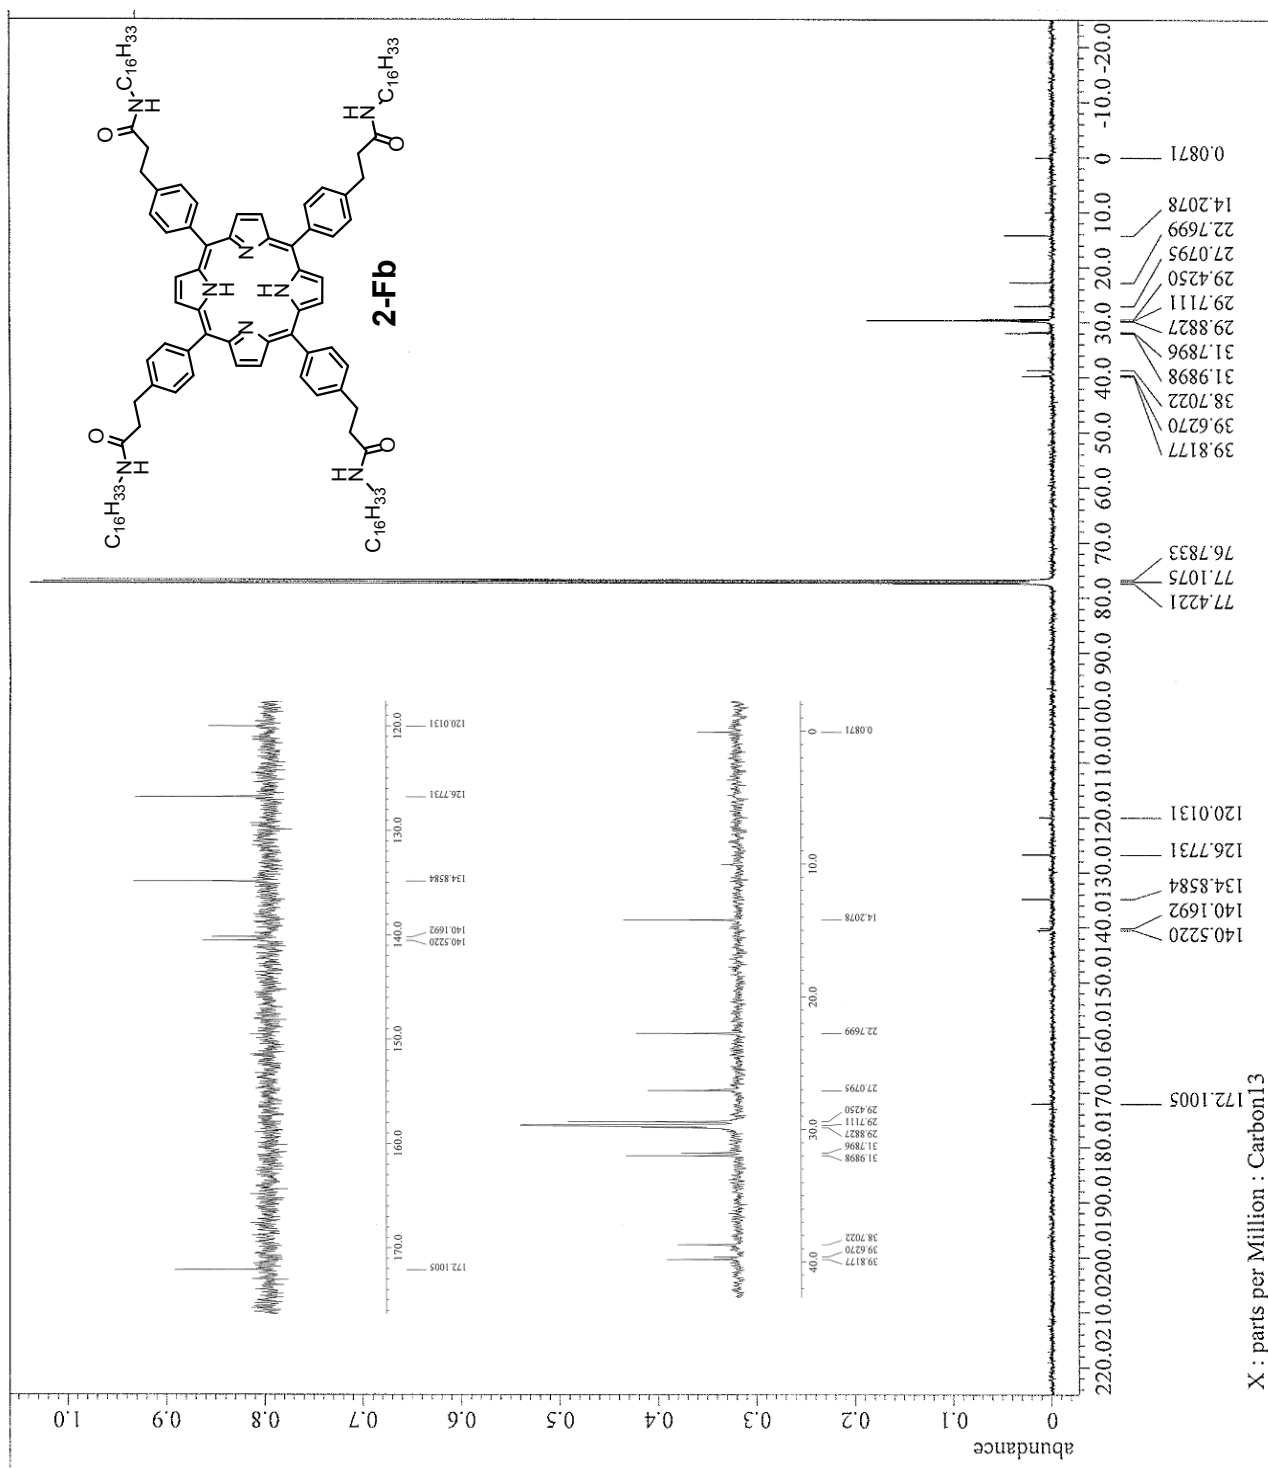

Figure S19. <sup>13</sup>C NMR spectra of **2-Fb** (CDCl<sub>3</sub>, 101 MHz)

## References

- [S1] T. Sakanoi, J.-y. Hasegawa, K. Higashiguchi and K. Matsuda, *Chem. Asian J.* **2012**, *7*, 394–399.
- [S2] S. Yokoyama, T. Hirose and K. Matsuda, *Chem. Commun.* **2014**, *50*, 5964–5966.
- [S3] N. R. Vautravers and B. Breit, *Synlett* **2011**, *17*, 2517–2520.
